# Supplementary material for: Reversal of glucocorticoid resistance in Acute Lymphoblastic Leukemia cells by miR-145
Source: PeerJ journal article supplement (doi:10.7717/peerj.9337), 2020-06-16
Supplement: Raw_Data_1.zip [file Raw_Data_1.zip]

## Sheet: mRNA
	Sample ID	surveillance project	Average CT value	GAPDH	ΔCt average	ΔCt standard variance	ΔΔCt	Average
8.29	MI	BAX	28.36	9.68	18.68	0.59	0.44	0.737135
8.29	MIN	BAX	28.02	9.78	18.24	0.96	0	1
8.29	MM	BAX	27.85	9.6	18.25	0.86	-0.94	1.91853
8.29	MMN	BAX	27.69	8.5	19.19	0.9	0	1
9.03	MI	BAX	26.96	31.7	-4.74	0.38	0.46	0.726986
9.03	MIN	BAX	25.07	30.27	-5.2	0.93	0	1
9.03	MM	BAX	26.7	32.14	-5.44	0.81	-0.8	1.7411
9.03	MMN	BAX	24.95	29.59	-4.64	0.2	0	1
10.27	MI	BAX	20.33	12.01	8.32	0.11	0.4	0.757858
10.27	MIN	BAX	18.93	11.01	7.92	0.07	0	1
10.27	MM	BAX	20.52	12.7	7.82	0.11	-0.92	1.89212
10.27	MMN	BAX	21.44	12.7	8.74	0.14	0	1
8.29	MI	BCL-2	18.74	9.68	9.06	0.19	-0.37	1.29235
8.29	MIN	BCL-2	19.21	9.78	9.43	0.15	0	1
8.29	MM	BCL-2	19.1	9.6	9.5	0.78	0.25	0.840896
8.29	MMN	BCL-2	17.75	8.5	9.25	0.79	0	1
9.22	MI	BCL-2	23.98	14.75	9.23	0.14	-0.68	1.60214
9.22	MIN	BCL-2	24.14	14.23	9.91	0.18	0	1
9.22	MM	BCL-2	24.55	15.02	9.53	0.18	0.64	0.641713
9.22	MMN	BCL-2	22.64	13.75	8.89	0.25	0	1
9.23	MI	BCL-2	24.58	15.4	9.18	0.07	-0.74	1.67018
9.23	MIN	BCL-2	24.22	14.3	9.92	0.08	0	1
9.23	MM	BCL-2	25.26	15.91	9.35	0.45	0.83	0.562529
9.23	MMN	BCL-2	23.93	15.41	8.52	0.32	0	1
9.23	MI	MDR1	26.11	15.4	10.71	0.12	-0.56	1.47427
9.23	MIN	MDR1	25.57	14.3	11.27	0.2	0	1
9.23	MM	MDR1	26.95	15.91	11.04	0.31	1.8	0.287175
9.23	MMN	MDR1	24.65	15.41	9.24	1.23	0	1
9.03	MI	MDR1	22.5	31.7	-9.2	1.23	-0.57	1.48452
9.03	MIN	MDR1	21.64	30.27	-8.63	0.25	0	1
9.03	MM	MDR1	22.99	32.14	-9.15	0.22	0.4	0.757858
9.03	MMN	MDR1	20.04	29.59	-9.55	0.18	0	1
8.29	MI	MDR1	19.8	9.68	10.12	0.16	-0.32	1.24833
8.29	MIN	MDR1	20.22	9.78	10.44	0.78	0	1
8.29	MM	MDR1	19.84	9.6	10.24	0.78	1.05	0.482968
8.29	MMN	MDR1	17.69	8.5	9.19	0.19	0	1

## Sheet: MDR1
	hole site	surveillance project	colourant	CT	Average CT value	CT standard variance	Sample ID
9.23	G04	MDR1	SYBR	26.04	26.11	0.1	MI
9.23	G05	MDR1	SYBR	26.23	26.11	0.1	MI
9.23	G06	MDR1	SYBR	26.07	26.11	0.1	MI
9.23	A02	MDR1	SYBR	24.98	25.57	0.51	MIN
9.23	B02	MDR1	SYBR	25.93	25.57	0.51	MIN
9.23	C02	MDR1	SYBR	25.79	25.57	0.51	MIN
9.23	G01	MDR1	SYBR	26.91	26.95	0.08	MM
9.23	G02	MDR1	SYBR	26.91	26.95	0.08	MM
9.23	G03	MDR1	SYBR	27.04	26.95	0.08	MM
9.23	D02	MDR1	SYBR	24.85	24.65	0.18	MMN
9.23	E02	MDR1	SYBR	24.6	24.65	0.18	MMN
9.23	F02	MDR1	SYBR	24.5	24.65	0.18	MMN
9.23	D01	GAPDH	SYBR	15.33	15.4	0.06	MI
9.23	E01	GAPDH	SYBR	15.45	15.4	0.06	MI
9.23	F01	GAPDH	SYBR	15.43	15.4	0.06	MI
9.23	D06	GAPDH	SYBR	14.25	14.3	0.333217	MIN
9.23	E06	GAPDH	SYBR	14.66	14.3	0.333217	MIN
9.23	F06	GAPDH	SYBR	14	14.3	0.333217	MIN
9.23	A01	GAPDH	SYBR	16.26	15.91	0.305123	MM
9.23	B01	GAPDH	SYBR	15.7	15.91	0.305123	MM
9.23	C01	GAPDH	SYBR	15.77	15.91	0.305123	MM
9.23	D04	GAPDH	SYBR	15.29	15.41	0.125033	MMN
9.23	E04	GAPDH	SYBR	15.54	15.41	0.125033	MMN
9.23	F04	GAPDH	SYBR	15.41	15.41	0.125033	MMN
9.03	B04	MDR1	SYBR	22.76	22.5	0.23	MI
9.03	B05	MDR1	SYBR	22.41	22.5	0.23	MI
9.03	B06	MDR1	SYBR	22.32	22.5	0.23	MI
9.03	D01	MDR1	SYBR	21.81	21.64	0.15	MIN
9.03	D02	MDR1	SYBR	21.51	21.64	0.15	MIN
9.03	D03	MDR1	SYBR	21.6	21.64	0.15	MIN
9.03	B01	MDR1	SYBR	22.83	22.99	0.23	MM
9.03	B02	MDR1	SYBR	23.25	22.99	0.23	MM
9.03	B03	MDR1	SYBR	22.9	22.99	0.23	MM
9.03	E07	MDR1	SYBR	20.04	20.04	0.07	MMN
9.03	E08	MDR1	SYBR	20.11	20.04	0.07	MMN
9.03	E09	MDR1	SYBR	19.98	20.04	0.07	MMN
9.03	H01	GAPDH	SYBR	31.7	31.7	0.475219	MI
9.03	H02	GAPDH	SYBR	31.25	31.7	0.475219	MI
9.03	H03	GAPDH	SYBR	30.75	31.7	0.475219	MI
9.03	H04	GAPDH	SYBR	29.34	30.27	0.915223	MIN
9.03	H05	GAPDH	SYBR	31.17	30.27	0.915223	MIN
9.03	H06	GAPDH	SYBR	30.29	30.27	0.915223	MIN
9.03	H07	GAPDH	SYBR	32.1	32.14	0.149778	MM
9.03	H08	GAPDH	SYBR	32.02	32.14	0.149778	MM
9.03	H09	GAPDH	SYBR	32.31	32.14	0.149778	MM
9.03	H10	GAPDH	SYBR	29.7	29.59	1.16414	MMN
9.03	H11	GAPDH	SYBR	28.37	29.59	1.16414	MMN
9.03	H12	GAPDH	SYBR	30.69	29.59	1.16414	MMN
8.29	G04	MDR1	SYBR	19.89	19.8	0.1	MI
8.29	G05	MDR1	SYBR	19.82	19.8	0.1	MI
8.29	G06	MDR1	SYBR	19.69	19.8	0.1	MI
8.29	F01	MDR1	SYBR	20.53	20.22	0.27	MIN
8.29	F02	MDR1	SYBR	20.13	20.22	0.27	MIN
8.29	F03	MDR1	SYBR	20.01	20.22	0.27	MIN
8.29	G01	MDR1	SYBR	19.91	19.84	0.09	MM
8.29	G02	MDR1	SYBR	19.74	19.84	0.09	MM
8.29	G03	MDR1	SYBR	19.88	19.84	0.09	MM
8.29	C04	MDR1	SYBR	17.69	17.69	0.15	MMN
8.29	C05	MDR1	SYBR	17.84	17.69	0.15	MMN
8.29	C06	MDR1	SYBR	17.54	17.69	0.15	MMN
8.29	A01	GAPDH	SYBR	9.59	9.68	0.12	MI
8.29	A02	GAPDH	SYBR	9.81	9.68	0.12	MI
8.29	A03	GAPDH	SYBR	9.64	9.68	0.12	MI
8.29	A04	GAPDH	SYBR	9.69	9.78	0.08	MIN
8.29	A05	GAPDH	SYBR	9.81	9.78	0.08	MIN
8.29	A06	GAPDH	SYBR	9.84	9.78	0.08	MIN
8.29	A07	GAPDH	SYBR	9.83	9.61	0.21	MM
8.29	A08	GAPDH	SYBR	9.58	9.61	0.21	MM
8.29	A09	GAPDH	SYBR	9.42	9.61	0.21	MM
8.29	A10	GAPDH	SYBR	8.53	8.54	0.530126	MMN
8.29	A11	GAPDH	SYBR	9.08	8.54	0.530126	MMN
8.29	A12	GAPDH	SYBR	8.02	8.54	0.530126	MMN

## Sheet: BCL-2
	hole site	surveillance project	colourant	CT	Average CT value	CT standard variance	Sample ID
8.29	B01	BCL-2	SYBR	19.03	18.74	0.479305	MI
8.29	B02	BCL-2	SYBR	18.19	18.74	0.479305	MI
8.29	B03	BCL-2	SYBR	19.01	18.74	0.479305	MI
8.29	B04	BCL-2	SYBR	19.07	19.21	0.176163	MIN
8.29	B05	BCL-2	SYBR	19.16	19.21	0.176163	MIN
8.29	B06	BCL-2	SYBR	19.41	19.21	0.176163	MIN
8.29	B07	BCL-2	SYBR	19.57	19.1	0.409512	MM
8.29	B08	BCL-2	SYBR	18.91	19.1	0.409512	MM
8.29	B09	BCL-2	SYBR	18.82	19.1	0.409512	MM
8.29	B10	BCL-2	SYBR	18.06	17.75	0.356791	MMN
8.29	B11	BCL-2	SYBR	17.36	17.75	0.356791	MMN
8.29	B12	BCL-2	SYBR	17.83	17.75	0.356791	MMN
8.29	A01	GAPDH	SYBR	9.59	9.68	0.12	MI
8.29	A02	GAPDH	SYBR	9.81	9.68	0.12	MI
8.29	A03	GAPDH	SYBR	9.64	9.68	0.12	MI
8.29	A04	GAPDH	SYBR	9.69	9.78	0.08	MIN
8.29	A05	GAPDH	SYBR	9.81	9.78	0.08	MIN
8.29	A06	GAPDH	SYBR	9.84	9.78	0.08	MIN
8.29	A07	GAPDH	SYBR	9.83	9.61	0.21	MM
8.29	A08	GAPDH	SYBR	9.58	9.61	0.21	MM
8.29	A09	GAPDH	SYBR	9.42	9.61	0.21	MM
8.29	A10	GAPDH	SYBR	8.53	8.54	0.530126	MMN
8.29	A11	GAPDH	SYBR	9.08	8.54	0.530126	MMN
8.29	A12	GAPDH	SYBR	8.02	8.54	0.530126	MMN
9.22	D02	BCL-2	SYBR	23.97	23.98	0.03	MI
9.22	E02	BCL-2	SYBR	24.01	23.98	0.03	MI
9.22	F02	BCL-2	SYBR	23.95	23.98	0.03	MI
9.22	A03	BCL-2	SYBR	24.88	24.14	0.813654	MIN
9.22	B03	BCL-2	SYBR	23.27	24.14	0.813654	MIN
9.22	C03	BCL-2	SYBR	24.28	24.14	0.813654	MIN
9.22	A02	BCL-2	SYBR	24.38	24.55	0.17	MM
9.22	B02	BCL-2	SYBR	24.72	24.55	0.17	MM
9.22	C02	BCL-2	SYBR	24.56	24.55	0.17	MM
9.22	D03	BCL-2	SYBR	22.84	22.64	0.20502	MMN
9.22	E03	BCL-2	SYBR	22.64	22.64	0.20502	MMN
9.22	F03	BCL-2	SYBR	22.43	22.64	0.20502	MMN
9.22	D01	GAPDH	SYBR	14.68	14.75	0.14	MI
9.22	E01	GAPDH	SYBR	14.9	14.75	0.14	MI
9.22	F01	GAPDH	SYBR	14.65	14.75	0.14	MI
9.22	D05	GAPDH	SYBR	13.92	14.23	0.607536	MIN
9.22	E05	GAPDH	SYBR	14.93	14.23	0.607536	MIN
9.22	F05	GAPDH	SYBR	13.84	14.23	0.607536	MIN
9.22	A01	GAPDH	SYBR	14.88	15.02	0.118462	MM
9.22	B01	GAPDH	SYBR	15.09	15.02	0.118462	MM
9.22	C01	GAPDH	SYBR	15.08	15.02	0.118462	MM
9.22	G01	GAPDH	SYBR	13.53	21.75	0.22	MMN
9.22	G02	GAPDH	SYBR	13.97	21.75	0.22	MMN
9.22	G03	GAPDH	SYBR	13.75	21.75	0.22	MMN
9.23	D03	BCL-2	SYBR	24.55	24.58	0.03	MI
9.23	E03	BCL-2	SYBR	24.6	24.58	0.03	MI
9.23	F03	BCL-2	SYBR	24.58	24.58	0.03	MI
9.23	D05	BCL-2	SYBR	24.18	24.22	0.0458258	MIN
9.23	E05	BCL-2	SYBR	24.27	24.22	0.0458258	MIN
9.23	F05	BCL-2	SYBR	24.21	24.22	0.0458258	MIN
9.23	A04	BCL-2	SYBR	24.98	25.26	0.33	MM
9.23	B04	BCL-2	SYBR	25.63	25.26	0.33	MM
9.23	C04	BCL-2	SYBR	25.17	25.26	0.33	MM
9.23	A03	BCL-2	SYBR	24.04	23.93	0.1	MMN
9.23	B03	BCL-2	SYBR	23.88	23.93	0.1	MMN
9.23	C03	BCL-2	SYBR	23.87	23.93	0.1	MMN
9.23	D01	GAPDH	SYBR	15.33	15.4	0.06	MI
9.23	E01	GAPDH	SYBR	15.45	15.4	0.06	MI
9.23	F01	GAPDH	SYBR	15.43	15.4	0.06	MI
9.23	D06	GAPDH	SYBR	14.25	14.3	0.333217	MIN
9.23	E06	GAPDH	SYBR	14.66	14.3	0.333217	MIN
9.23	F06	GAPDH	SYBR	14	14.3	0.333217	MIN
9.23	A01	GAPDH	SYBR	16.26	15.91	0.305123	MM
9.23	B01	GAPDH	SYBR	15.7	15.91	0.305123	MM
9.23	C01	GAPDH	SYBR	15.77	15.91	0.305123	MM
9.23	D04	GAPDH	SYBR	15.29	15.41	0.125033	MMN
9.23	E04	GAPDH	SYBR	15.54	15.41	0.125033	MMN
9.23	F04	GAPDH	SYBR	15.41	15.41	0.125033	MMN

## Sheet: BAX
	hole site	surveillance project	colourant	CT	Average CT value	CT standard variance	Sample ID
8.29	D04	BAX	SYBR	27.92	28.36	0.58	MI
8.29	D05	BAX	SYBR	28.14	28.36	0.58	MI
8.29	D06	BAX	SYBR	29.02	28.36	0.58	MI
8.29	H07	BAX	SYBR	28.02	28.02	0.13	MIN
8.29	H08	BAX	SYBR	28.15	28.02	0.13	MIN
8.29	H09	BAX	SYBR	27.89	28.02	0.13	MIN
8.29	D01	BAX	SYBR	28.15	27.85	0.39	MM
8.29	D02	BAX	SYBR	27.41	27.85	0.39	MM
8.29	D03	BAX	SYBR	27.97	27.85	0.39	MM
8.29	H04	BAX	SYBR	27.35	27.69	0.315331	MMN
8.29	H05	BAX	SYBR	27.97	27.69	0.315331	MMN
8.29	H06	BAX	SYBR	27.76	27.69	0.315331	MMN
8.29	A01	GAPDH	SYBR	9.59	9.68	0.12	MI
8.29	A02	GAPDH	SYBR	9.81	9.68	0.12	MI
8.29	A03	GAPDH	SYBR	9.64	9.68	0.12	MI
8.29	A04	GAPDH	SYBR	9.69	9.78	0.08	MIN
8.29	A05	GAPDH	SYBR	9.81	9.78	0.08	MIN
8.29	A06	GAPDH	SYBR	9.84	9.78	0.08	MIN
8.29	A07	GAPDH	SYBR	9.83	9.61	0.21	MM
8.29	A08	GAPDH	SYBR	9.58	9.61	0.21	MM
8.29	A09	GAPDH	SYBR	9.42	9.61	0.21	MM
8.29	A10	GAPDH	SYBR	8.53	8.54	0.530126	MMN
8.29	A11	GAPDH	SYBR	9.08	8.54	0.530126	MMN
8.29	A12	GAPDH	SYBR	8.02	8.54	0.530126	MMN
9.03	F01	BAX	SYBR	27.27	26.96	0.38	MI
9.03	F02	BAX	SYBR	27.09	26.96	0.38	MI
9.03	F03	BAX	SYBR	26.53	26.96	0.38	MI
9.03	G01	BAX	SYBR	25.3	25.07	0.2	MIN
9.03	G02	BAX	SYBR	24.97	25.07	0.2	MIN
9.03	G03	BAX	SYBR	24.94	25.07	0.2	MIN
9.03	F04	BAX	SYBR	26.63	26.7	0.13	MM
9.03	F05	BAX	SYBR	26.62	26.7	0.13	MM
9.03	F06	BAX	SYBR	26.85	26.7	0.13	MM
9.03	G04	BAX	SYBR	24.92	24.95	0.0264575	MMN
9.03	G05	BAX	SYBR	24.96	24.95	0.0264575	MMN
9.03	G06	BAX	SYBR	24.97	24.95	0.0264575	MMN
9.03	H01	GAPDH	SYBR	31.7	31.7	0.475219	MI
9.03	H02	GAPDH	SYBR	31.25	31.7	0.475219	MI
9.03	H03	GAPDH	SYBR	30.75	31.7	0.475219	MI
9.03	H04	GAPDH	SYBR	29.34	30.27	0.915223	MIN
9.03	H05	GAPDH	SYBR	31.17	30.27	0.915223	MIN
9.03	H06	GAPDH	SYBR	30.29	30.27	0.915223	MIN
9.03	H07	GAPDH	SYBR	32.1	32.14	0.149778	MM
9.03	H08	GAPDH	SYBR	32.02	32.14	0.149778	MM
9.03	H09	GAPDH	SYBR	32.31	32.14	0.149778	MM
9.03	H10	GAPDH	SYBR	29.7	29.59	1.16414	MMN
9.03	H11	GAPDH	SYBR	28.37	29.59	1.16414	MMN
9.03	H12	GAPDH	SYBR	30.69	29.59	1.16414	MMN
10.27	A05	BAX	SYBR	20.32	20.33	0.11	MI
10.27	B05	BAX	SYBR	20.44	20.33	0.11	MI
10.27	C05	BAX	SYBR	20.23	20.33	0.11	MI
10.27	A03	BAX	SYBR	18.89	18.93	0.416693	MIN
10.27	B03	BAX	SYBR	18.54	18.93	0.416693	MIN
10.27	C03	BAX	SYBR	19.37	18.93	0.416693	MIN
10.27	A01	BAX	SYBR	20.55	20.52	0.104083	MM
10.27	B01	BAX	SYBR	20.4	20.52	0.104083	MM
10.27	C01	BAX	SYBR	20.6	20.52	0.104083	MM
10.27	A06	BAX	SYBR	21.72	21.44	0.502394	MMN
10.27	B06	BAX	SYBR	21.74	21.44	0.502394	MMN
10.27	C06	BAX	SYBR	20.86	21.44	0.502394	MMN
10.27	A08	GAPDH	SYBR	11.97	12.01	0.03	MI
10.27	B08	GAPDH	SYBR	12.03	12.01	0.03	MI
10.27	C08	GAPDH	SYBR	12.02	12.01	0.03	MI
10.27	A07	GAPDH	SYBR	11.02	11.01	0.22	MIN
10.27	B07	GAPDH	SYBR	10.79	11.01	0.22	MIN
10.27	C07	GAPDH	SYBR	11.23	11.01	0.22	MIN
10.27	A04	GAPDH	SYBR	12.72	12.7	0.03	MM
10.27	B04	GAPDH	SYBR	12.72	12.7	0.03	MM
10.27	C04	GAPDH	SYBR	12.66	12.7	0.03	MM
10.27	A09	GAPDH	SYBR	12.74	12.7	0.35171	MMN
10.27	B09	GAPDH	SYBR	12.33	12.7	0.35171	MMN
10.27	C09	GAPDH	SYBR	13.03	12.7	0.35171	MMN
