# Supplementary material for: Reversal of glucocorticoid resistance in Acute Lymphoblastic Leukemia cells by miR-145
Source: PeerJ journal article supplement (doi:10.7717/peerj.9337), 2020-06-16
Supplement: Raw_Data_2.zip [file Raw_Data_2.zip]

## Sheet: mRNA
	Sample ID	surveillance project	Average CT value	GAPDH	ΔCt average	ΔCt standard variance	ΔΔCt	Average
9.22	MI	BECLIN 1	28.26	14.75	13.51	0.16	0.85	0.554785
9.22	MIN	BECLIN 1	26.89	14.23	12.66	1.01	0	1
9.22	MM	BECLIN 1	28.4	15.02	13.38	0.16	-0.6	1.51572
9.22	MMN	BECLIN 1	27.73	13.75	13.98	0.42	0	1
10.27	MI	BECLIN 1	27.4	12.01	15.39	0.15	0.33	0.795536
10.27	MIN	BECLIN 1	26.07	11.01	15.06	0.2	0	1
10.27	MM	BECLIN 1	27.52	12.7	14.82	0.27	-0.43	1.34723
10.27	MMN	BECLIN 1	27.95	12.7	15.25	1.23	0	1
10.27	MI	BECLIN 1	20.92	11.78	9.14	0.18	0.86	0.550953
10.27	MIN	BECLIN 1	21.5	13.22	8.28	0.13	0	1
10.27	MM	BECLIN 1	20.61	11.79	8.82	0.36	-0.46	1.37554
10.27	MMN	BECLIN 1	20.83	11.55	9.28	0.14	0	1
9.22	MI	LC Ⅰ	31.85	14.75	17.1	0.79	1.13	0.456916
9.22	MIN	LC Ⅰ	30.2	14.23	15.97	0.42	0	1
9.22	MM	LC Ⅰ	31.26	15.02	16.24	0.58	-0.54	1.45397
9.22	MMN	LC Ⅰ	30.53	13.75	16.78	0.64	0	1
9.23	MI	LC Ⅰ	32.06	15.4	16.66	0.85	0.77	0.586417
9.23	MIN	LC Ⅰ	30.19	14.3	15.89	1.01	0	1
9.23	MM	LC Ⅰ	32.32	15.91	16.41	0.57	-0.27	1.20581
9.23	MMN	LC Ⅰ	32.09	15.41	16.68	0.42	0	1
10.27	MI	LC Ⅰ	23.47	11.78	11.69	0.96	1.05	0.482968
10.27	MIN	LC Ⅰ	23.86	13.22	10.64	0.31	0	1
10.27	MM	LC Ⅰ	23.29	11.79	11.5	0.91	-0.35	1.27456
10.27	MMN	LC Ⅰ	23.73	11.88	11.85	0.16	0	1
9.22	MI	LC Ⅱ	21.75	14.75	7	0.15	0.58	0.668964
9.22	MIN	LC Ⅱ	20.65	14.23	6.42	0.15	0	1
9.22	MM	LC Ⅱ	21.1	15.02	6.08	0.23	-0.7	1.6245
9.22	MMN	LC Ⅱ	20.53	13.75	6.78	1.21	0	1
10.27	MI	LC Ⅱ	13.37	11.78	1.59	0.14	1.55	0.34151
10.27	MIN	LC Ⅱ	13.26	13.22	0.04	0.05	0	1
10.27	MM	LC Ⅱ	13.03	11.79	1.24	0.25	-0.77	1.70527
10.27	MMN	LC Ⅱ	13.56	11.55	2.01	1.22	0	1
10.27	MI	LC Ⅱ	18.51	12.01	6.5	0.12	0.47	0.721965
10.27	MIN	LC Ⅱ	17.04	11.01	6.03	0.14	0	1
10.27	MM	LC Ⅱ	18.88	12.7	6.18	0.08	-0.75	1.68179
10.27	MMN	LC Ⅱ	19.63	12.7	6.93	0.07	0	1
9.23	MI	MDR1	26.11	15.4	10.71	0.12	-0.56	1.47427
9.23	MIN	MDR1	25.57	14.3	11.27	0.2	0	1
9.23	MM	MDR1	26.95	15.91	11.04	0.31	1.8	0.287175
9.23	MMN	MDR1	24.65	15.41	9.24	1.23	0	1
9.03	MI	MDR1	22.5	31.7	-9.2	1.23	-0.57	1.48452
9.03	MIN	MDR1	21.64	30.27	-8.63	0.25	0	1
9.03	MM	MDR1	22.99	32.14	-9.15	0.22	0.4	0.757858
9.03	MMN	MDR1	20.04	29.59	-9.55	0.18	0	1
8.29	MI	MDR1	19.8	9.68	10.12	0.16	-0.32	1.24833
8.29	MIN	MDR1	20.22	9.78	10.44	0.78	0	1
8.29	MM	MDR1	19.84	9.6	10.24	0.78	1.05	0.482968
8.29	MMN	MDR1	17.69	8.5	9.19	0.19	0	1

## Sheet: LC Ⅱ
	hole site	surveillance project	colourant	CT	Average CT value	CT standard variance	Sample ID
9.22	G04	LC Ⅱ	SYBR	21.53	21.75	0.22	MI
9.22	G05	LC Ⅱ	SYBR	21.97	21.75	0.22	MI
9.22	G06	LC Ⅱ	SYBR	21.75	21.75	0.22	MI
9.22	A05	LC Ⅱ	SYBR	20.64	20.65	0.11	MIN
9.22	B05	LC Ⅱ	SYBR	20.55	20.65	0.11	MIN
9.22	C05	LC Ⅱ	SYBR	20.76	20.65	0.11	MIN
9.22	G07	LC Ⅱ	SYBR	21.14	21.1	0.05	MM
9.22	G08	LC Ⅱ	SYBR	21.04	21.1	0.05	MM
9.22	G09	LC Ⅱ	SYBR	21.12	21.1	0.05	MM
9.22	D04	LC Ⅱ	SYBR	20.52	20.53	0.01	MMN
9.22	E04	LC Ⅱ	SYBR	20.53	20.53	0.01	MMN
9.22	F04	LC Ⅱ	SYBR	20.54	20.53	0.01	MMN
9.22	D01	GAPDH	SYBR	14.68	14.75	0.14	MI
9.22	E01	GAPDH	SYBR	14.9	14.75	0.14	MI
9.22	F01	GAPDH	SYBR	14.65	14.75	0.14	MI
9.22	D05	GAPDH	SYBR	13.92	14.23	0.607536	MIN
9.22	E05	GAPDH	SYBR	14.93	14.23	0.607536	MIN
9.22	F05	GAPDH	SYBR	13.84	14.23	0.607536	MIN
9.22	A01	GAPDH	SYBR	14.88	15.02	0.118462	MM
9.22	B01	GAPDH	SYBR	15.09	15.02	0.118462	MM
9.22	C01	GAPDH	SYBR	15.08	15.02	0.118462	MM
9.22	G01	GAPDH	SYBR	13.53	21.75	0.22	MMN
9.22	G02	GAPDH	SYBR	13.97	21.75	0.22	MMN
9.22	G03	GAPDH	SYBR	13.75	21.75	0.22	MMN
10.27	A04	LC Ⅱ	SYBR	13.63	13.37	0.22	MI
10.27	B04	LC Ⅱ	SYBR	13.28	13.37	0.22	MI
10.27	C04	LC Ⅱ	SYBR	13.21	13.37	0.22	MI
10.27	A05	LC Ⅱ	SYBR	13.55	13.26	0.25	MIN
10.27	B05	LC Ⅱ	SYBR	13.13	13.26	0.25	MIN
10.27	C05	LC Ⅱ	SYBR	13.11	13.26	0.25	MIN
10.27	A08	LC Ⅱ	SYBR	13.13	13.03	0.09	MM
10.27	B08	LC Ⅱ	SYBR	12.97	13.03	0.09	MM
10.27	C08	LC Ⅱ	SYBR	13	13.03	0.09	MM
10.27	A01	LC Ⅱ	SYBR	13.2	13.56	0.45	MMN
10.27	B01	LC Ⅱ	SYBR	14.06	13.56	0.45	MMN
10.27	C01	LC Ⅱ	SYBR	13.42	13.56	0.45	MMN
10.27	D01	GAPDH	SYBR	11.69	11.78	0.12	MI
10.27	D02	GAPDH	SYBR	11.91	11.78	0.12	MI
10.27	D03	GAPDH	SYBR	11.74	11.78	0.12	MI
10.27	A09	GAPDH	SYBR	13.6	13.22	0.33	MIN
10.27	B09	GAPDH	SYBR	13.05	13.22	0.33	MIN
10.27	C09	GAPDH	SYBR	13.02	13.22	0.33	MIN
10.27	D06	GAPDH	SYBR	11.86	11.79	0.11	MM
10.27	D07	GAPDH	SYBR	11.85	11.79	0.11	MM
10.27	D08	GAPDH	SYBR	11.66	11.79	0.11	MM
10.27	A10	GAPDH	SYBR	11.53	11.55	0.13	MMN
10.27	B10	GAPDH	SYBR	11.43	11.55	0.13	MMN
10.27	C10	GAPDH	SYBR	11.69	11.55	0.13	MMN
10.27	E06	LC Ⅱ	SYBR	18.52	18.51	0.12	MI
10.27	E07	LC Ⅱ	SYBR	18.63	18.51	0.12	MI
10.27	E08	LC Ⅱ	SYBR	18.39	18.51	0.12	MI
10.27	A02	LC Ⅱ	SYBR	16.91	17.04	0.12	MIN
10.27	B02	LC Ⅱ	SYBR	17.07	17.04	0.12	MIN
10.27	C02	LC Ⅱ	SYBR	17.14	17.04	0.12	MIN
10.27	E01	LC Ⅱ	SYBR	18.79	18.88	0.08	MM
10.27	E02	LC Ⅱ	SYBR	18.92	18.88	0.08	MM
10.27	E03	LC Ⅱ	SYBR	18.92	18.88	0.08	MM
10.27	A10	LC Ⅱ	SYBR	19.42	19.63	0.35	MMN
10.27	B10	LC Ⅱ	SYBR	19.44	19.63	0.35	MMN
10.27	C10	LC Ⅱ	SYBR	20.03	19.63	0.35	MMN
10.27	A08	GAPDH	SYBR	11.97	12.01	0.03	MI
10.27	B08	GAPDH	SYBR	12.03	12.01	0.03	MI
10.27	C08	GAPDH	SYBR	12.02	12.01	0.03	MI
10.27	A07	GAPDH	SYBR	11.02	11.01	0.22	MIN
10.27	B07	GAPDH	SYBR	10.79	11.01	0.22	MIN
10.27	C07	GAPDH	SYBR	11.23	11.01	0.22	MIN
10.27	A04	GAPDH	SYBR	12.72	12.7	0.03	MM
10.27	B04	GAPDH	SYBR	12.72	12.7	0.03	MM
10.27	C04	GAPDH	SYBR	12.66	12.7	0.03	MM
10.27	A09	GAPDH	SYBR	12.74	12.7	0.35171	MMN
10.27	B09	GAPDH	SYBR	12.33	12.7	0.35171	MMN
10.27	C09	GAPDH	SYBR	13.03	12.7	0.35171	MMN

## Sheet: LC Ⅰ
	hole site	surveillance project	colourant	CT	Average CT value	CT standard variance	Sample ID
9.22	A08	LC Ⅰ	SYBR	32.25	31.85	0.41	MI
9.22	B08	LC Ⅰ	SYBR	31.85	31.85	0.41	MI
9.22	C08	LC Ⅰ	SYBR	31.44	31.85	0.41	MI
9.22	A04	LC Ⅰ	SYBR	30.64	30.2	0.65	MIN
9.22	B04	LC Ⅰ	SYBR	30.51	30.2	0.65	MIN
9.22	C04	LC Ⅰ	SYBR	29.46	30.2	0.65	MIN
9.22	D08	LC Ⅰ	SYBR	30.5	31.26	0.78	MM
9.22	E08	LC Ⅰ	SYBR	31.23	31.26	0.78	MM
9.22	F08	LC Ⅰ	SYBR	32.06	31.26	0.78	MM
9.22	D04	LC Ⅰ	SYBR	30.26	30.53	0.24	MMN
9.22	E04	LC Ⅰ	SYBR	30.62	30.53	0.24	MMN
9.22	F04	LC Ⅰ	SYBR	30.72	30.53	0.24	MMN
9.22	D01	GAPDH	SYBR	14.68	14.75	0.14	MI
9.22	E01	GAPDH	SYBR	14.9	14.75	0.14	MI
9.22	F01	GAPDH	SYBR	14.65	14.75	0.14	MI
9.22	D05	GAPDH	SYBR	13.92	14.23	0.607536	MIN
9.22	E05	GAPDH	SYBR	14.93	14.23	0.607536	MIN
9.22	F05	GAPDH	SYBR	13.84	14.23	0.607536	MIN
9.22	A01	GAPDH	SYBR	14.88	15.02	0.118462	MM
9.22	B01	GAPDH	SYBR	15.09	15.02	0.118462	MM
9.22	C01	GAPDH	SYBR	15.08	15.02	0.118462	MM
9.22	G01	GAPDH	SYBR	13.53	21.75	0.22	MMN
9.22	G02	GAPDH	SYBR	13.97	21.75	0.22	MMN
9.22	G03	GAPDH	SYBR	13.75	21.75	0.22	MMN
9.23	D07	LC Ⅰ	SYBR	31.23	32.06	0.84	MI
9.23	E07	LC Ⅰ	SYBR	32.92	32.06	0.84	MI
9.23	F07	LC Ⅰ	SYBR	32.04	32.06	0.84	MI
9.23	A06	LC Ⅰ	SYBR	29.47	30.19	0.72	MIN
9.23	B06	LC Ⅰ	SYBR	30.91	30.19	0.72	MIN
9.23	C06	LC Ⅰ	SYBR	30.2	30.19	0.72	MIN
9.23	A07	LC Ⅰ	SYBR	32.65	32.32	0.48	MM
9.23	B07	LC Ⅰ	SYBR	32.54	32.32	0.48	MM
9.23	C07	LC Ⅰ	SYBR	31.77	32.32	0.48	MM
9.23	D05	LC Ⅰ	SYBR	32.31	32.09	0.26	MMN
9.23	E05	LC Ⅰ	SYBR	32.16	32.09	0.26	MMN
9.23	F05	LC Ⅰ	SYBR	31.8	32.09	0.26	MMN
9.23	D01	GAPDH	SYBR	15.33	15.4	0.06	MI
9.23	E01	GAPDH	SYBR	15.45	15.4	0.06	MI
9.23	F01	GAPDH	SYBR	15.43	15.4	0.06	MI
9.23	D06	GAPDH	SYBR	14.25	14.3	0.333217	MIN
9.23	E06	GAPDH	SYBR	14.66	14.3	0.333217	MIN
9.23	F06	GAPDH	SYBR	14	14.3	0.333217	MIN
9.23	A01	GAPDH	SYBR	16.26	15.91	0.305123	MM
9.23	B01	GAPDH	SYBR	15.7	15.91	0.305123	MM
9.23	C01	GAPDH	SYBR	15.77	15.91	0.305123	MM
9.23	D04	GAPDH	SYBR	15.29	15.41	0.125033	MMN
9.23	E04	GAPDH	SYBR	15.54	15.41	0.125033	MMN
9.23	F04	GAPDH	SYBR	15.41	15.41	0.125033	MMN
10.27	A03	LC Ⅰ	SYBR	24.26	23.47	0.9	MI
10.27	B03	LC Ⅰ	SYBR	23.67	23.47	0.9	MI
10.27	C03	LC Ⅰ	SYBR	22.49	23.47	0.9	MI
10.27	A02	LC Ⅰ	SYBR	23.5	23.86	0.31	MIN
10.27	B02	LC Ⅰ	SYBR	24.03	23.86	0.31	MIN
10.27	C02	LC Ⅰ	SYBR	24.05	23.86	0.31	MIN
10.27	A07	LC Ⅰ	SYBR	24.03	23.29	0.96	MM
10.27	B07	LC Ⅰ	SYBR	23.62	23.29	0.96	MM
10.27	C07	LC Ⅰ	SYBR	22.21	23.29	0.96	MM
10.27	A06	LC Ⅰ	SYBR	24.03	23.73	0.41	MMN
10.27	B06	LC Ⅰ	SYBR	23.9	23.73	0.41	MMN
10.27	C06	LC Ⅰ	SYBR	23.26	23.73	0.41	MMN
10.27	D01	GAPDH	SYBR	11.69	11.78	0.12	MI
10.27	D02	GAPDH	SYBR	11.91	11.78	0.12	MI
10.27	D03	GAPDH	SYBR	11.74	11.78	0.12	MI
10.27	A09	GAPDH	SYBR	13.6	13.22	0.33	MIN
10.27	B09	GAPDH	SYBR	13.05	13.22	0.33	MIN
10.27	C09	GAPDH	SYBR	13.02	13.22	0.33	MIN
10.27	D06	GAPDH	SYBR	11.86	11.79	0.11	MM
10.27	D07	GAPDH	SYBR	11.85	11.79	0.11	MM
10.27	D08	GAPDH	SYBR	11.66	11.79	0.11	MM
10.27	A10	GAPDH	SYBR	11.53	11.55	0.13	MMN
10.27	B10	GAPDH	SYBR	11.43	11.55	0.13	MMN
10.27	C10	GAPDH	SYBR	11.69	11.55	0.13	MMN

## Sheet: BECLIN 1
	hole site	surveillance project	colourant	CT	Average CT value	CT standard variance	Sample ID
9.22	D06	BECLIN 1	SYBR	28.19	28.26	0.08	MI
9.22	E06	BECLIN 1	SYBR	28.35	28.26	0.08	MI
9.22	F06	BECLIN 1	SYBR	28.25	28.26	0.08	MI
9.22	D07	BECLIN 1	SYBR	26.67	26.89	0.27	MIN
9.22	E07	BECLIN 1	SYBR	27.2	26.89	0.27	MIN
9.22	F07	BECLIN 1	SYBR	26.81	26.89	0.27	MIN
9.22	A06	BECLIN 1	SYBR	28.45	28.4	0.15	MM
9.22	B06	BECLIN 1	SYBR	28.23	28.4	0.15	MM
9.22	C06	BECLIN 1	SYBR	28.52	28.4	0.15	MM
9.22	D08	BECLIN 1	SYBR	27.82	27.73	0.16	MMN
9.22	E08	BECLIN 1	SYBR	27.83	27.73	0.16	MMN
9.22	F08	BECLIN 1	SYBR	27.54	27.73	0.16	MMN
9.22	D01	GAPDH	SYBR	14.68	14.75	0.14	MI
9.22	E01	GAPDH	SYBR	14.9	14.75	0.14	MI
9.22	F01	GAPDH	SYBR	14.65	14.75	0.14	MI
9.22	D05	GAPDH	SYBR	13.92	14.23	0.607536	MIN
9.22	E05	GAPDH	SYBR	14.93	14.23	0.607536	MIN
9.22	F05	GAPDH	SYBR	13.84	14.23	0.607536	MIN
9.22	A01	GAPDH	SYBR	14.88	15.02	0.118462	MM
9.22	B01	GAPDH	SYBR	15.09	15.02	0.118462	MM
9.22	C01	GAPDH	SYBR	15.08	15.02	0.118462	MM
9.22	G01	GAPDH	SYBR	13.53	21.75	0.22	MMN
9.22	G02	GAPDH	SYBR	13.97	21.75	0.22	MMN
9.22	G03	GAPDH	SYBR	13.75	21.75	0.22	MMN
10.27	F01	BECLIN 1	SYBR	27.33	27.4	0.14	MI
10.27	F02	BECLIN 1	SYBR	27.56	27.4	0.14	MI
10.27	F03	BECLIN 1	SYBR	27.31	27.4	0.14	MI
10.27	F04	BECLIN 1	SYBR	26.11	26.07	0.03	MIN
10.27	F05	BECLIN 1	SYBR	26.05	26.07	0.03	MIN
10.27	F06	BECLIN 1	SYBR	26.06	26.07	0.03	MIN
10.27	F07	BECLIN 1	SYBR	27.77	27.52	0.27	MM
10.27	F08	BECLIN 1	SYBR	27.23	27.52	0.27	MM
10.27	F09	BECLIN 1	SYBR	27.57	27.52	0.27	MM
10.27	F10	BECLIN 1	SYBR	27.89	27.95	0.39	MMN
10.27	F11	BECLIN 1	SYBR	27.6	27.95	0.39	MMN
10.27	F12	BECLIN 1	SYBR	28.37	27.95	0.39	MMN
10.27	A08	GAPDH	SYBR	11.97	12.01	0.03	MI
10.27	B08	GAPDH	SYBR	12.03	12.01	0.03	MI
10.27	C08	GAPDH	SYBR	12.02	12.01	0.03	MI
10.27	A07	GAPDH	SYBR	11.02	11.01	0.22	MIN
10.27	B07	GAPDH	SYBR	10.79	11.01	0.22	MIN
10.27	C07	GAPDH	SYBR	11.23	11.01	0.22	MIN
10.27	A04	GAPDH	SYBR	12.72	12.7	0.03	MM
10.27	B04	GAPDH	SYBR	12.72	12.7	0.03	MM
10.27	C04	GAPDH	SYBR	12.66	12.7	0.03	MM
10.27	A09	GAPDH	SYBR	12.74	12.7	0.35171	MMN
10.27	B09	GAPDH	SYBR	12.33	12.7	0.35171	MMN
10.27	C09	GAPDH	SYBR	13.03	12.7	0.35171	MMN
10.27	E01	BECLIN 1	SYBR	21.28	20.92	0.34	MI
10.27	E02	BECLIN 1	SYBR	20.62	20.92	0.34	MI
10.27	E03	BECLIN 1	SYBR	20.85	20.92	0.34	MI
10.27	E04	BECLIN 1	SYBR	21.53	21.5	0.31	MIN
10.27	E05	BECLIN 1	SYBR	21.79	21.5	0.31	MIN
10.27	E06	BECLIN 1	SYBR	21.18	21.5	0.31	MIN
10.27	E07	BECLIN 1	SYBR	20.69	20.61	0.14	MM
10.27	E08	BECLIN 1	SYBR	20.69	20.61	0.14	MM
10.27	E09	BECLIN 1	SYBR	20.44	20.61	0.14	MM
10.27	E10	BECLIN 1	SYBR	21.2	20.83	0.32	MMN
10.27	E11	BECLIN 1	SYBR	20.65	20.83	0.32	MMN
10.27	E12	BECLIN 1	SYBR	20.64	20.83	0.32	MMN
10.27	D01	GAPDH	SYBR	11.69	11.78	0.12	MI
10.27	D02	GAPDH	SYBR	11.91	11.78	0.12	MI
10.27	D03	GAPDH	SYBR	11.74	11.78	0.12	MI
10.27	A09	GAPDH	SYBR	13.6	13.22	0.33	MIN
10.27	B09	GAPDH	SYBR	13.05	13.22	0.33	MIN
10.27	C09	GAPDH	SYBR	13.02	13.22	0.33	MIN
10.27	D06	GAPDH	SYBR	11.86	11.79	0.11	MM
10.27	D07	GAPDH	SYBR	11.85	11.79	0.11	MM
10.27	D08	GAPDH	SYBR	11.66	11.79	0.11	MM
10.27	A10	GAPDH	SYBR	11.53	11.55	0.13	MMN
10.27	B10	GAPDH	SYBR	11.43	11.55	0.13	MMN
10.27	C10	GAPDH	SYBR	11.69	11.55	0.13	MMN
