# Supplementary material for: Reversal of glucocorticoid resistance in Acute Lymphoblastic Leukemia cells by miR-145
Source: PeerJ. 2020 Jun 16;8:e9337. doi: 10.7717/peerj.9337 (PMC7304417; doi:10.7717/peerj.9337)
Supplement: Supplemental Information 3 [file peerj-08-9337-s003.xlsx]

## Sheet: clinicalExp
id	futime		fustat	hsa-mir-6802	hsa-mir-6516	hsa-mir-214	hsa-mir-589	hsa-mir-105-2	hsa-mir-153-2	hsa-let-7b	hsa-mir-376c	hsa-mir-2115	hsa-mir-5699	hsa-mir-301a	hsa-mir-6511b-2	hsa-mir-30c-1	hsa-mir-210	hsa-mir-3127	hsa-mir-7850	hsa-mir-101-1	hsa-mir-1277	hsa-mir-1271	hsa-mir-3691	hsa-mir-124-3	hsa-mir-200b	hsa-mir-6877	hsa-mir-4739	hsa-mir-30b	hsa-mir-4762	hsa-mir-659	hsa-mir-23a	hsa-mir-5579	hsa-mir-4662a	hsa-mir-320a	hsa-mir-4449	hsa-mir-6503	hsa-mir-6751	hsa-mir-20a	hsa-mir-412	hsa-mir-3615	hsa-mir-4781	hsa-mir-33a	hsa-mir-129-1	hsa-mir-7-1	hsa-mir-30d	hsa-mir-3917	hsa-mir-155	hsa-mir-579	hsa-mir-3609
TARGET-10-PAPHYN	3012	8.25205	0	3.678	16.1381	43.9551	44.6484	0	1.46273	57519.7	3.98036	0	0	392.461	2.0691	1967.04	960.017	4.90272	0	2752.33	3.03229	0.199098	7.52273	0	40.7635	8.5538	14.8262	8589.79	1.43929	1.74919	842.908	0	6.16257	34494.7	2.07657	7.2943	1.75033	65877	0	220.381	8.86105	20.3572	9.32013	413.04	31063	2.06916	35479.1	6.85692	7.11434
TARGET-10-PANYEJ	3875	10.6164	0	3.30923	3.37914	0.293357	798.186	0.121879	3.3321	7184.91	0.310416	0.177391	0.25267	307.887	0.250905	3.30657	90.102	35.2716	8.54492	16136.3	0.245514	6.38919	6.20675	0.246613	3.38929	0.244857	0.274322	3286.2	14.0728	3.3724	2864.46	0.253926	9.39086	18638.7	30.1844	6.03321	6.20987	7651.31	11.0831	54.2472	0.248193	33.2378	0.306996	278.473	52381.6	159.969	4688.43	0.262012	80.8563
TARGET-10-PARJLA	2912	7.97808	0	8.36869	18.7636	0.165313	44.3836	0.0800333	0.172251	37884.6	0.172385	0.110734	2.31339	250.301	6.40136	3225.92	664.701	4.43278	2.27707	2540.58	4.35457	0.164269	12.4873	0.144738	29.4739	4.35257	22.8922	4483.69	0.140191	2.3228	814.08	10.453	2.31034	52178	19.1409	6.31796	18.5081	118591	0.132377	563.257	4.36255	79.87	2.29837	986.3	15694.5	6.53892	9330.99	6.45252	113.492
TARGET-10-PANWYK	3581	9.81096	0	0.0378036	12.7403	0.0416328	798.429	0.024163	3.8683	15506.6	0.0428107	0.031231	0.0385063	210.142	1.32744	3.86397	48.443	33.0372	32.455	70781	12.6632	26.7449	6.39657	0.0379982	19.1388	2.59692	0.0402291	4010.09	18.8808	7.67467	5929.05	3.86688	44.5858	14533.7	12.7922	7.62138	6.39708	15588.1	2.58605	57.3638	3.86343	39.5186	2.59627	224.183	186255	44.5092	18351.4	1.32773	8.97079
TARGET-10-PARYAJ	2697	7.38904	1	1.84675	26.0247	11.8758	81.9983	0.101828	3.53563	1212.71	14.7707	0.0971829	0.0970106	129.637	6.96608	4122.5	883.554	5.2526	0.0974038	1613.5	0.0838533	0.10905	15.2322	0.101565	88.8422	8.58617	18.8421	3690.69	0.0901402	1.84545	1804.51	23.6081	12.0892	28534	32.5548	3.50006	5.25946	73023.1	0.0945482	503.021	1.83852	54.558	1.81927	1643.88	13140.7	1.82938	18896.3	6.91254	150.331
TARGET-10-PARZYX	2766	7.57808	0	0.176012	5.00656	5.04066	66.8332	0.0944501	0.214847	54397.9	2.60866	0.132989	0.181121	176.053	0.180044	3362.88	328.263	2.65418	0.162775	2906.87	0.176741	2.65107	11.7637	0.177416	9.7834	2.62131	9.66837	4563.33	0.171362	2.64895	582.565	40.5704	0.209629	36048.2	12.1738	0.17049	0.183562	133517	0.161042	301.875	2.62659	61.8688	0.213093	869.917	14383.5	2.65029	11935.5	0.186778	111.627
TARGET-10-PASDYM	2653	7.26849	0	1.98855	18.2051	14.7933	53.2837	1.79615	0.129943	65283.4	12.9815	1.91106	1.99311	128.354	0.1125	3880.87	774.827	5.6624	0.103381	1602.72	3.78988	0.124558	9.16795	0.111133	34.7703	10.853	53.9261	6743.67	3.77234	1.99782	1287.71	7.37877	0.127404	48464.8	185.797	0.107494	23.3009	75428.2	0.102449	422.981	1.99082	169.829	7.4929	824.233	14708.9	22.0492	10961.6	7.41308	368.852
TARGET-10-PANSHK	2447	6.70411	1	3.85148	0.597974	0	1480.07	10.4345	59.2165	30909.2	0	0	8.30787	158.901	7.10588	5.318	6854.18	65.7718	10.9011	27611.7	3.97892	83.2548	3.86067	1.6767	20.6989	9.74114	11.8253	5037.09	6.1768	21.7431	3959	3.85459	289.287	22563.7	12.1714	0	5.66004	6998.44	10.602	180.47	2.41436	16.5171	37.873	407.364	185361	63.9713	2919.94	4.95569	4.20652
TARGET-10-PARBGL	3246	8.89315	0	3.718	44.0882	5.58827	32.639	3.71786	5.58489	40163.4	5.60072	0.919719	30.859	92.3473	4.65019	3144.02	594.233	9.31499	2.78562	2792.11	0.920499	3.71848	2.78521	0	68.2034	3.71862	2.78483	8951.97	0.919908	1.85214	3241.76	4.652	0	35932.8	9.31527	6.53286	4.65047	42843.6	0	442.191	9.33742	33.5756	0.922166	407.657	37105.4	0.921526	36475.8	1.85202	224.125
TARGET-10-PANWEZ	3145	8.61644	0	1.75481	1.75984	19.679	21.3492	0.0510738	22.9965	21370.2	1.73814	1.70411	6.58646	135.663	9.76422	4300.06	2844.59	1.75822	0.0802378	1489.57	3.37064	0.0952538	9.79152	1.75562	108.705	4.96989	25.9341	5386.3	1.75168	1.75979	3222.3	3.37999	0.0972364	32799	6.66629	0.0831909	6.59816	56110.9	0.0795659	214.025	6.57266	55.5823	96.3902	1517.09	14690.5	13.1755	11713.2	1.75929	133.826
TARGET-10-PAMXHJ	4089	11.2027	0	18.9988	6.65342	0	1332.75	0	28.0982	19203.3	0	1.29386	0.607416	695.705	23.0528	3.30084	4418.82	32.95	6.05563	75263.7	28.5815	90.8986	4.64255	0	9.32166	1.27495	3.28488	10558.4	8.07823	22.9236	3793.31	0.607476	266.255	13123.7	21.4	12.1947	12.7876	14760.8	4.68803	201.157	1.27471	48.2493	0	628.375	415316	44.3375	32277.5	8.6973	1.95297
TARGET-10-PANDBX	1719	4.70959	1	5.13348	15.0346	11.418	41.9868	0.0397802	0.0423406	47456.9	2.5797	0.038311	1.32447	215.982	1.32245	3243.6	683.766	5.1357	2.59448	4768.24	1.31764	0.0420102	5.12701	0.0396977	22.831	7.65446	19.0933	6257.6	7.59127	0.0404795	2509.95	0.0393393	2.59335	70958.4	17.8497	11.3391	1.32341	78384.9	2.59117	303.752	7.61658	21.654	8.94262	995.07	18234	1.31749	56342.2	1.3246	48.2175
TARGET-10-PASMGZ	2403	6.58356	0	1.97496	4.9408	13.8382	69.1989	0	7.90658	41251.9	8.89517	0	9.88645	200.682	4.94143	4012.69	916.421	3.95196	0	2304.4	0.986348	0	8.89708	0	9.88358	14.8334	25.7068	6964.61	3.95294	1.97484	1845.69	3.95243	0	24329.2	19.7696	1.97505	3.95236	80351.6	0	368.744	10.8761	55.36	14.8264	931.251	24274.8	3.95195	32889.4	0.986352	118.632
TARGET-10-PAPAXK	3790	10.3836	0	2.55863	9.87598	27.8658	50.3058	0	9.05196	110220	2.95044	0	0	237.603	2.55367	3938.7	502.292	5.60359	0.267087	4612.47	2.17101	1.40744	5.65034	0	27.4769	4.89685	13.3514	11377	0.641568	4.0824	1000.48	12.3183	0.278992	36262.8	3.31445	0	0.642877	124885	0	197.438	6.455	23.1794	9.04187	574.142	30579.9	1.02953	14276.3	13.0437	7.13297
TARGET-10-PAPMVB	1413	3.87123	1	7.71279	0.2819	0.332825	642.707	0.357716	179.911	2620.57	0.277103	4.10045	0.328436	81.1197	15.0428	4.11901	7713.32	11.5627	0.33074	51750.6	0.258834	55.3145	10.9993	0.356055	4.19214	0.343717	0.385727	1765.59	3.93826	18.4132	2671.84	4.15979	7.89599	5941.52	0.412094	0.294187	7.81876	7090.02	4.04373	396.28	7.32806	29.7395	0.418057	1078.79	106079	18.9193	5398.37	7.63572	4.21169
TARGET-10-PASLMB	2485	6.80822	0	1.41481	19.8305	7.54509	42.3616	0	0.425413	96665.8	12.977	0	0.91142	667.513	5.96016	5939.87	323.838	5.96682	0	4250.09	5.10038	0	9.0716	0	18.7294	8.03773	11.5319	12054.4	1.41992	1.91958	2025.45	2.42382	1.92886	21699.2	8.99691	3.47439	1.91955	98463.7	0.91131	171.738	9.6771	41.4055	18.1032	461.318	25153.4	12.5287	39386.3	8.54977	33.8924
TARGET-10-PATAAH	2161	5.92055	0	3.74072	17.7201	24.4993	38.6163	0	48.1934	57610.9	15.2201	0.271298	0	316.456	3.73101	3345.34	555.272	2.93779	0.6453	3636.7	6.88496	1.79431	4.89236	0	13.6961	2.56907	5.2512	9522.77	2.18614	0.647868	2482.63	0	0	19993.7	4.85772	0.269282	2.17502	133456	1.80796	293.006	5.30158	51.7155	8.31192	914.742	24114.1	2.17607	22296.5	5.66024	9.45949
TARGET-10-PARUNW	2790	7.64384	0	6.42857	19.1862	4.89945	39.0748	2.1756	0	32170	13.9307	0.647224	0.271561	288.031	1.41535	2820.32	1183.55	2.95991	0.647325	2438.23	5.05061	0.663527	6.06074	0	24.7209	11.9243	8.32534	8918.38	0.269676	2.17654	2316.46	0	2.18807	19354.3	6.79439	1.8041	5.25125	81067.7	0	351.115	7.31209	25.6376	19.0958	550.81	26168	4.49068	25869	9.17997	16.0427
TARGET-10-PARMSP	584	1.6	1	16.8751	2.64384	0.0426027	1960.8	0.0440503	24.7693	94533.2	1.35499	0.0423966	9.10077	13.0653	35.0601	9.15577	3570.43	44.2666	14.2401	6624.93	0.0374855	102.68	2.66042	0.0439573	10.4385	2.66096	245.84	6775.67	0.039833	13.037	3700.59	5.25348	3.96076	58433.9	14.3661	7.767	6.55989	2298.94	2.65497	180.79	9.06899	33.843	5.25137	452.548	313808	48.1618	10662.2	7.83309	14.3526
TARGET-10-PANRAL	2979	8.16164	0	7.28885	1.54793	0.0693271	2582.54	0.0384934	828.488	6684.44	2.99188	0.0506306	1.54711	62.7462	7.3066	4.44388	288.568	14.6136	1.53961	132923	4.43135	24.7844	8.75374	1.54615	11.7434	2.99316	1.54772	11294	11.5196	36.028	6126.26	0.0637861	5.92336	13797.1	58.2562	1.54358	14.4763	18902.2	7.21343	220.049	5.86894	59.7639	8.83505	626.538	340165	118.782	15255.5	10.2068	32.1449
TARGET-10-PAPLUG	1155	3.16438	1	4.18008	0.208889	0	1343.36	0	129.98	1907.35	0	0.211253	5.55731	54.9491	6.82865	4.1994	649.183	70.2519	3.527	30015.3	0.208831	9.47932	8.5824	0	21.3202	13.6602	2.18634	2528.48	3.91645	29.6749	2947.22	0.53616	110.401	17195.1	10.1489	0	8.50838	3689.73	12.114	148.846	0.860117	25.7695	16.4687	645.583	86856.8	45.0032	1967.39	4.85964	1.19908
TARGET-10-PAMXSP	4383	12.0082	0	6.51295	0.779766	0	1482.76	0	96.1463	43950.4	0	0	8.96807	57.0172	4.04593	4.04596	758.022	29.3782	15.6434	60802.7	3.22883	20.3605	5.68181	0	5.66626	0	1.59254	4549.88	8.16873	17.1467	2879.74	0	32.5797	9113.64	9.74148	8.99547	22.1129	12095.3	7.36861	261.634	5.68792	30.1244	1.59793	642.277	141036	67.7646	22382.7	5.67799	6.48356
TARGET-10-PASLCJ	2303	6.30959	0	5.11026	13.0895	7.34357	34.0915	0	1.73175	35775.5	185.162	0	0	226.119	3.55169	5442.72	516.158	2.95487	0.785929	2310.75	1.73766	1.41739	8.58509	0	35.501	7.63086	2.63073	10662.4	2.0327	1.70752	3226.59	0	3.86776	16132.7	3.26434	2.66167	2.32066	66881.8	1.70939	171.874	8.37741	37.8483	91.4	651.227	19918.2	1.11354	26835.6	7.00213	15.3032
TARGET-10-PANCVR	473	1.29589	1	10.4639	4.83275	0	2171.65	0	300.718	72600.2	0	0	2.37983	139.455	14.4821	13.6676	2486.85	30.591	2.37959	34966.4	6.49162	131.454	4.80387	0.769144	43.6774	3.18577	8.82793	5047.81	11.3646	22.583	2536.78	0	12.0498	11998	98.3242	0	11.2583	24709.5	8.067	297.436	5.63008	135.571	48.3272	2508.72	128406	62.0437	9942.47	29.1541	10.4416
TARGET-10-PAPNFY	1217	3.33425	1	10.0133	2.67635	0.195126	528.803	0.205912	5.20691	9765.07	0.169367	0.193628	0.19318	253.861	17.4468	0.230017	484.356	27.4783	7.51022	13943.6	9.21316	86.3667	2.75334	0.205206	10.0662	2.75609	24.7653	4354.02	5.00491	5.2347	3568.72	5.19372	10.1915	16909.5	7.69743	11.7954	7.67751	4912.33	2.72675	89.2216	0.184364	17.5784	0.230362	212.704	130103	7.70614	4228.24	2.75629	0.217923
TARGET-10-PATELK	676	1.85205	1	3.08794	14.063	9.02973	35.076	0	9.23228	45319.3	27.9647	0.201053	27.4282	891.152	1.80063	4994.17	1672.95	4.713	0.514809	2992.58	5.9313	3.42063	7.35663	0	48.079	12.6263	11.4989	8939.55	1.81071	2.76278	2927.39	0.834293	8.2503	20851.1	5.35984	2.46832	8.92499	94154.4	0	514.163	7.11109	78.9423	5.05307	675.119	20843.9	1.81657	39425.8	12.6249	5.99051
TARGET-10-PAPGGT	2507	6.86849	0	9.85198	1.06826	0	898.038	0	13.749	75122.1	0	0	0	74.8388	8.06334	12.6108	647.204	51.5944	2.8229	115630	11.0265	31.7268	17.4413	0	24.171	22.8618	28.4095	9130.93	12.8494	17.9475	5605.31	7.46867	57.6533	37221.2	20.0919	1.64638	15.6744	36908.2	1.07042	280.671	5.72368	156.415	2.22942	1283.63	174437	45.0562	34575.7	11.5407	1.07988
TARGET-10-PASTSR	2482	6.8	0	6.77814	13.1299	3.50845	41.5603	0	0.365081	52580	3.98071	0.810577	0.79671	271.749	2.61143	3692.78	614.085	3.05462	0	2412.66	3.53428	2.15334	6.28047	0	13.0334	0.796418	0.79971	8973.45	0.796524	0.798395	807.458	24.4219	0	36152.6	7.58239	1.24895	5.35835	95482.6	0.798003	182.447	3.99133	74.7398	0	618.175	24013.4	3.96011	4200.37	8.56809	31.1401
TARGET-10-PASUBW	474	1.29863	1	3.19025	4.55384	0	1649.9	0.587502	942.709	1957.13	0	0	45.0284	215.369	14.3022	18.8526	5273.6	115.478	3.85333	44799.6	5.25619	36.4743	15.7245	214.729	9.73949	14.3907	31.9856	3942.41	7.88163	16.946	3006.86	0	1.24239	23364.3	38.4183	0	9.72986	33095	0	36.4614	11.1737	130.07	57590	2055.21	129851	44.9527	17500	16.3723	0
TARGET-10-PASUWG	2357	6.45753	0	3.87674	25.3047	17.5357	47.3731	42.467	14.3688	25315.2	8.68711	1.62258	0	271.438	4.44592	5116.49	1351.32	6.68688	0.995343	2621.89	2.71241	0.721786	10.5631	0	40.4829	8.577	17.1183	10765.3	1.56426	1.84175	5754.08	4.14952	1.85621	35713.6	2.7045	27.8664	4.43428	96614.3	0.711021	226.982	6.49963	114.274	29.1556	1181.74	18821.1	10.6741	36530.5	5.00268	99.5931
TARGET-10-PASHUI	605	1.65753	1	0.24161	0.200008	0.229559	623.182	0.243363	38.9615	4729.41	0.197131	8.3302	5.72178	58.2015	8.60826	11.3435	179.497	19.6686	13.49	44603.2	0.186021	16.9093	3.08842	0.242454	5.83976	0.23565	3.10867	2279.43	3.00044	11.2699	2717.55	21.5257	8.63854	5126.26	0.272129	0.207303	3.1108	11368.1	5.66005	416.08	0.21592	5.87502	0.275172	223.604	157491	19.6681	8697.69	3.09293	3.10819
TARGET-10-PARWRJ	2915	7.9863	0	2.35408	10.8085	589.301	49.5688	0.0823547	2.3384	31618	4.49055	0.114268	22.8216	113.905	0.151905	4324.24	2948.67	0.167167	0.138261	1529.63	0.14931	0.170385	4.47329	0.149841	32.1734	10.5589	17.0951	8687.49	0.14507	4.50054	2614.96	6.5417	10.9688	27664.6	21.662	2.34272	16.8152	56571.2	0.136882	377.463	12.6228	45.1968	45.2618	1042.48	20210.8	17.3167	33902.2	0.157172	311.998
TARGET-10-PANWFB	2939	8.05205	0	5.67934	0	0	1857.25	0	376.667	30754.1	0	2.43268	0	129.305	10.5932	2.41071	252.943	19.5206	0.777514	105390	6.49832	98.6574	3.21856	0.777067	12.9806	1.58967	1.5889	6688.17	22.1611	22.8442	5175.19	0	16.2308	4163.21	17.0448	2.40734	8.12508	21005.7	10.659	98.3887	6.49564	116.371	43.0769	813.437	116262	21.1319	16547.2	5.66612	10.5355
TARGET-10-PAPHJF	483	1.32329	1	9.54068	0	0	2195.43	0	40.7765	33254.4	0.308199	0.719372	40.1903	186.226	26.3047	9.91148	6980.04	101.4	0.310213	17729.6	1.57097	159.715	10.0057	5.31703	7.41275	8.29498	30.0659	3265.46	8.02647	23.8428	3469.57	26.1619	26.1892	22388.8	5.31452	0.718891	17.0878	12318.4	6.65742	187.72	6.67052	57.2067	90.0286	642.681	100501	16.1516	16204.6	18.5175	3.6331
TARGET-10-PANYZE	3065	8.39726	1	10.6445	0.556375	0	1597.69	0	45.1202	80885.1	0	0	4.33479	135.596	17.5381	14.3693	1498.49	97.9158	6.23728	73359.3	5.05519	71.5574	13.219	1.18093	9.36453	15.1173	37.7176	6504.49	10.1635	29.5856	3347.93	11.9244	0.564475	17758.1	3.07148	8.8623	25.7889	13219.8	8.17506	83.4147	11.394	55.2561	20.0206	1285.11	212155	20.0086	53342.7	7.49111	15.0073
TARGET-10-PARAPE	2991	8.19452	0	2.41798	6.12189	4.95591	44.138	0	3.84772	56709.4	7.53223	1.61813	5.30185	361.716	0.708302	3843.52	781.377	2.68711	0.153935	2303.66	1.84251	1.84289	6.45361	0	27.7845	14.1736	7.55118	9103.91	3.59004	1.83685	2197.53	16.1349	1.85135	24160.7	3.82796	0.989925	3.55752	87401.1	2.15261	234.109	12.0696	47.3166	128.631	666.698	26676.7	5.52372	19228.9	6.43492	12.6201
TARGET-10-PANRYM	1675	4.58904	0	9.7233	7.99371	0	1172.62	0	10.116	18442.3	0.998498	0	0	262.091	14.091	4.22272	1350.29	22.5801	14.8657	48617.3	15.7844	45.7839	4.76194	0	7.42122	0.980952	13.9559	5677.07	3.15023	17.8094	5758.85	0.449895	67.189	17910.1	29.4719	3.69895	2.05365	10569	4.82941	301.835	1.51706	21.9254	5.2807	297.993	210079	7.96038	18980	6.92786	5.81567
TARGET-10-PATCJJ	2296	6.29041	0	5.88582	12.8201	55.4321	19.6434	0	20.6192	45174.5	26.5392	0	0	402.726	1.37656	8066.93	342.334	5.81761	0	4909.02	3.369	0.404824	5.85833	0	15.2102	0.398003	7.81739	21637.1	5.39917	0.400279	3018.26	0	0	25447.6	0	0	0.88544	140802	0.397426	247.655	8.90437	25.5576	25.0558	468.174	41110.5	1.38219	52022.5	11.3615	21.1082
TARGET-10-PANXDR	3801	10.4137	0	10.2113	1.70835	0	1167.65	0	1225.66	5677.59	0	1.13179	0	410.955	19.333	6.50437	985.369	48.0243	5.99459	65628.1	19.9923	76.1734	5.92294	0	14.2617	3.51813	2.30452	9025.61	9.01832	18.5985	9448.09	15.0415	595.876	36573.8	11.8581	7.79863	22.3315	19192.5	2.93491	477.245	10.8052	56.1042	0	786.491	272289	22.6626	9149.78	12.5689	4.69907
TARGET-10-PANKRG	3932	10.7726	0	0.220147	3.11596	0.261601	586.748	0.112597	22.5038	11492.2	0.275806	0.162059	0.227265	204.946	0.22576	3.0482	127.662	19.4004	7.991	29824.1	10.8093	38.4604	10.9749	0.222098	3.12017	13.3261	0.245616	8069.08	0.21371	0.239874	4247.53	5.74403	183.321	16351.2	596.079	13.1268	0.230683	12576.9	0.199567	218.816	0.223447	14.2131	0.272967	371.145	119545	62.7479	8835.76	13.6641	28.039
TARGET-10-PANLGK	2597	7.11507	0	2.78541	17.6456	24.5192	58.5811	0.0311411	4.14546	25153.7	19.1215	1.40889	38.8827	145.645	6.82709	2718.53	480.366	6.87335	5.43838	3004.31	2.78602	0.0545706	10.8648	0.0498034	51.6103	16.1578	13.6166	4461.52	0.0486414	0.0521489	1865.47	0.0506439	4.15498	29382.5	16.4008	8.12775	6.83753	33872.5	0.0465964	221.823	9.49994	50.3823	1.42264	902.104	12915	13.6675	33926.9	2.79277	133.287
TARGET-10-PARVWD	255	0.69863	1	3.6882	1.44842	0	568.318	0	243.823	2130.59	0	2.9431	15.783	76.9902	9.67432	5.93898	2410.36	12.6601	2.1927	27459	4.49657	59.8078	4.44265	0.700109	33.7716	2.19159	4.43352	4448.22	14.3726	26.2101	1898.76	35.3623	8.1725	7533.85	6.68145	12.8358	7.43113	22906.8	3.70024	187.669	1.4455	64.3413	4.44516	2165.92	145168	13.4074	24019.7	15.7442	5.92919
TARGET-10-PAPEJN	934	2.5589	1	5.40166	0.517569	0	1201.21	3.43489	68.1192	33101.3	0.201016	0.519249	22.8857	53.8234	13.8747	5.08404	2470.91	102.685	15.7976	31627.3	0.201014	33.6802	17.4041	0	9.65952	3.4414	24.3429	4784.02	5.52336	23.4573	3038.9	1.16232	38.9203	31967.7	5.07194	0	4.73403	7731.6	17.9609	197.18	3.47103	13.5086	1.84082	554.064	132813	26.5088	3730.51	5.41465	3.43276
TARGET-10-PAPFXN	1160	3.17808	0	5.48912	3.38397	0	856.417	0.651242	35.0989	21053.3	0	0.634684	0	376.523	6.17784	2.01932	4713.36	39.4306	28.9205	92606.4	20.9224	33.1228	8.2611	0	3.38288	1.31651	0.631376	4019.19	12.5281	20.0779	6045.83	0	168.567	5873.32	35.8208	4.10188	23.6447	19823.8	13.3156	294.415	14.5846	31.6618	4.76684	1073.6	162241	46.2765	11518.5	8.24979	4.07751
TARGET-10-PAPKNJ	3476	9.52329	0	1.87796	8.77509	5.36793	74.8672	0.0580365	15.7852	21720.2	1.86003	0.0781773	0.100858	156.486	1.88087	3709.45	305.952	3.62794	0.0925179	1178.14	0.0988995	0.110696	10.3989	0.0992027	29.5578	5.28557	51.2864	5732.02	0.0964667	0.104802	1600.35	13.7492	0.113119	35635.4	8.84481	5.25749	1.88286	71990.2	0.0917115	260.678	1.87975	52.1989	7.09715	495.305	19510.2	7.10337	42536.5	1.88418	100.766
TARGET-10-PANWHJ	3770	10.3288	0	44.4505	6.96095	0.0567173	1578.85	0.0587554	7.08672	86321.9	1.47419	1.4818	0.0563408	33.7378	108.724	9.88772	4443.2	316.549	9.80728	2222.49	0.0495757	58.9249	40.1509	0.0586243	7.08109	19.511	71.2352	1880.37	1.47699	15.4536	6808.8	0.0580554	11.3035	27991.2	44.9509	9.71626	152.815	1629.38	5.64194	555.179	2.87276	26.7053	4.2732	159.933	321065	117.756	15305.9	8.44834	16.883
TARGET-10-PANTTZ	3642	9.97808	0	0.9168	10.6285	5.98918	77.6003	0.436082	9.04825	26807.6	7.52751	0.933215	1.42271	318.969	3.46859	3707.01	531.656	1.42517	0	3316.83	3.98999	1.93253	4.4909	0	54.4909	3.99089	12.6722	14360.7	3.48436	0.417148	1084.72	0	0.424624	31156.6	2.44379	2.96851	2.95124	111061	0	250.847	7.09152	29.8725	163.631	658.143	44812.8	0.924157	26220.1	15.8396	39.521
TARGET-10-PANSXG	3830	10.4932	0	2.82443	0.215811	0.231242	950.598	0.103105	20.7681	12355.7	0.242953	4.79054	0.20257	339.819	7.7223	5.36147	1009.69	20.4442	16.5395	45055.9	7.67386	75.453	2.84669	0.198211	13.0653	0.196943	0.217958	6144.7	7.59117	0.213159	3856.96	2.8428	146.967	4874.5	5.43189	0.190088	5.3294	10408.1	11.966	125.544	2.83228	46.2054	0.240619	644.3	61291.5	43.1421	6264.93	10.2547	18.226
TARGET-10-PARUAT	2964	8.12055	0	2.33178	9.17728	732.237	38.5622	0	1.74364	14745.9	25.5117	0	4.16016	195.646	3.53799	4710.45	903.593	4.75283	1.12701	2482.73	2.36511	0	13.3197	0	19.9569	7.19603	10.7902	9582.45	6.66752	0	1272.41	2.93682	7.76284	20924.3	13.1973	3.57305	1.73021	57708.7	1.12734	303.001	9.10133	19.24	4.763	677.851	23836.2	2.34257	22563.3	10.8604	52.0474
TARGET-10-PAPTLM	919	2.51781	1	8.20552	0.424955	0	1818.63	0	566.316	29877.1	0	0.426148	22.5406	150.921	18.5597	9.21556	5653.24	98.6871	1.4511	16551.2	0.425625	98.2474	9.28127	1.45141	9.75482	4.0431	47.6869	1750.84	6.22115	14.9476	1321.37	118.975	3.52145	17794.1	7.14012	1.45593	45.7719	16072.7	8.82001	145.645	6.71308	33.5335	61.4002	1711.8	79830.5	23.1524	4104.38	13.999	9.20479
TARGET-10-PAPEWB	3430	9.39726	0	3.34823	0.880594	0	782.209	0	770.917	1111.65	0	0.39765	102.884	147.528	4.33603	11.6862	1439.37	45.3984	7.94998	27593.9	3.84517	26.969	12.8237	0	14.1309	6.3488	15.2091	2683.37	7.88816	10.7673	2847.7	95.7132	15.0963	22797.7	8.22715	0	1.85667	23586.7	1.37437	47.4588	1.85878	75.5297	3.33786	968.532	56404.9	21.038	21357.9	13.2895	3.33668
TARGET-10-PANWVW	3567	9.7726	0	7.05165	0.0256643	0.0266527	964.417	1.18369	4.73004	19595.5	1.20334	0.0202936	0.0247617	136.297	2.38327	16.475	1482.48	44.5471	0.0231784	20140.5	2.38234	9.43208	12.8971	1.2091	1.20718	0.0243618	22.2837	3727.41	7.0434	11.7498	4045.72	9.39481	177.186	17051	14.1332	1.20856	18.7255	13902.8	2.37611	165.664	5.88915	42.3148	56.4153	408.835	144654	15.2986	10012.1	14.0754	25.8807
TARGET-10-PARDWE	504	1.38082	1	5.48467	0.900641	0	1540.84	0	18.3151	28953.4	0	1.81639	31.2589	172.333	8.23301	16.4834	2154.07	10.982	0.900293	36008.7	2.74149	65.0756	0	0	5.48353	3.65038	2.73274	2471.21	11.0312	12.823	6040.57	0	110.943	2237.47	6.40018	0	8.23468	20760.7	2.73477	216.311	10.0972	50.4138	1.81977	429.882	84200.3	74.2385	4690.36	9.16068	7.31554
TARGET-10-PANSBK	1179	3.23014	0	5.32252	20.8903	5.24823	47.9128	10.7469	6.41991	53715.5	5.27023	0.272181	2.56881	403.624	1.4105	5322.75	534.452	2.94395	1.03091	3266.06	3.35496	1.41678	6.46876	0	37.7065	4.53334	11.871	14128.6	1.80131	1.41011	3050.14	5.69072	2.18744	23544.6	5.25109	0.646456	4.51106	112757	0	312.424	7.28377	36.7917	110.291	688.212	33042.9	7.55706	27822.3	8.80124	15.6232
TARGET-10-PARXCD	1326	3.63288	0	3.94922	21.1288	57.5372	52.3546	0	1.11259	54472.1	60.8245	0.294975	0.293994	90.7025	1.89691	3687.53	236.419	3.91004	0	2330.25	1.49311	2.29978	1.89536	0	35.5499	2.30682	0	12899.2	0.292717	0.691431	1191.9	5.57766	1.90528	32325.3	6.33185	1.90397	3.52237	57161.3	3.57919	265.569	11.8206	24.0994	85.9304	888.037	38476.2	1.09782	10525.5	6.37965	24.4965
TARGET-10-PANTSM	1214	3.32603	1	7.01752	0	0	766.921	0	2562.83	51825	0	3.49629	2.61505	97.6137	6.13142	6.13566	2364.17	30.7579	0.85598	82291.8	8.85033	78.2783	1.73441	0	14.0666	1.73437	12.2917	7782.04	6.16069	28.1666	3458.27	1.73434	38.6841	15097	11.4089	0	20.2311	27131.5	3.49872	215.465	8.8071	74.7822	9.65383	719.437	154034	34.2771	3724.75	11.4343	13.1717
TARGET-10-PARUYU	2477	6.7863	0	0.156958	15.4385	22.265	66.6766	0.0860775	0.189556	48928.8	37.8998	0.119975	0.16129	117.574	0.160378	3323.32	288.091	9.06607	2.4002	1598.8	0.157577	4.68135	8.88581	0.15815	24.4577	8.78953	28.3229	4264.55	4.54975	6.81632	1419.47	6.74698	0.185219	43958.1	9.11478	2.42114	8.88914	86667.7	2.39504	462.543	4.592	77.4626	0.1881	1053.89	14814.7	9.09881	10322.3	0.16607	139.278
TARGET-10-PARAKF	1942	5.32055	0	2.64674	0	0	1543.41	0	814.604	33215.4	0.616763	0.616705	36.413	179.141	5.3593	9.44009	4568.75	58.293	4.01531	51193.9	2.68019	18.9276	14.9779	1.96852	20.3859	0.617313	24.4075	6222.59	4.73201	23.0903	3838.54	7.42061	199.817	23013.8	6.04371	0.616345	6.04142	15316.9	4.02424	78.6284	0	41.3614	0.627277	984.4	75635.7	61.0143	8014.96	12.9078	21.6805
TARGET-10-PASIGB	2354	6.44932	0	2.94174	12.0999	7.46918	40.8005	0	0.928703	16849.9	145.842	0.926647	1.41326	249.412	4.47102	4438.91	732.584	0.915039	0.41094	1261.73	3.45266	0.917382	3.95261	0	32.8263	3.45337	7.49542	9573.44	2.43575	1.41306	1484.9	4.46672	2.93167	19379.1	3.4349	1.4163	3.44207	61707.4	0.410976	172.606	7.04927	57.524	2.93843	651.295	28704.6	1.92064	19426.6	9.06242	14.5361
TARGET-10-PANGIF	428	1.1726	1	5.3648	2.10247	0.459232	1784.85	0	237.58	34260	2.10487	0.459036	18.7334	95.2926	17.385	10.2691	1290.65	32.0495	0	26959.3	1.00424	112.868	2.08522	206.054	8.09908	2.08484	1.00422	1696.51	7.69133	16.3184	3183.38	15.8528	21.7038	7458.63	2.64266	0.457987	26.2171	14632.5	8.19	281.633	8.76229	53.4005	76.7251	1457.5	77812.1	11.3449	1918.25	5.92367	4.80624
TARGET-10-PATEVE	2150	5.89041	0	8.96489	41.8129	36.1257	29.656	0.0886297	13.8246	38954.1	13266	2.33832	38.7572	165.348	2.49818	12066.7	124.706	0.183708	0.150826	3004.9	2.49127	2.51341	6.90427	366.94	40.591	6.8334	6.99565	5466.49	0.158525	0.175218	794.424	0.167923	2.50151	28216.1	43.0705	2.47596	6.90669	42773.4	6.65537	337.109	0.164802	47.6666	4103	602.016	12335.6	4.78852	4982.37	0.172279	587.303
TARGET-10-PAPAIZ	3632	9.95068	0	17.7789	5.92432	0.0266807	2075.68	0.0275284	19.0277	16297	0.0244818	0.0265596	1.22375	58.1875	40.3044	13.0893	2012.79	128.163	20.0842	3191.31	2.39651	103.224	5.96042	0.0274741	2.41216	16.5802	186.977	3090.42	0.0250482	21.3553	3927.09	0.0272381	0.0288919	57969.7	24.9629	0.0252051	3.59944	4577.47	0.0260003	363.161	2.40763	45.1064	1.21672	674.117	279185	106.807	14107.3	16.5807	15.4573
TARGET-10-PAPEAB	3353	9.1863	0	8.90273	5.50925	0	1964.51	0	0	40306.4	0	1.99943	0	124.444	30.2798	4.7597	3687.77	79.7299	10.3279	9295.07	0.628605	72.1918	5.4526	0	2.68489	15.866	33.0262	5073.87	2.70205	13.72	11385	0.628451	10.9344	35073	21.936	6.195	10.9566	5771.75	2.00155	510.249	18.7933	26.7669	17.1336	655.254	385881	53.5839	16845.8	2.68661	3.37258
TARGET-10-PANYGB	2110	5.78082	1	0.845121	20.1786	0	894.429	0	236.674	39951.9	0	0.84471	31.4707	131.38	0.846161	30.4268	676.903	40.8685	2.58466	54130.9	3.4742	33.91	1.71361	28.7723	15.66	0.844888	49.6368	3163.62	8.72811	9.54963	1947.23	57.656	0	13171.4	12362.9	1.71573	8.67825	17869.9	18.3524	138.318	4.33466	140.188	3882.6	3734.59	30759.4	18.2438	2801.66	6.9441	128.119
TARGET-10-PANXDB	3737	10.2384	0	13.5091	0.750662	2.32955	710.732	0	1680.6	44196.6	2.33635	0	0.749878	315.451	17.4867	7.0814	433.987	41.9992	6.34111	58162.3	7.11061	36.3942	7.09762	0	11.8183	2.33184	9.46153	12190.8	3.92658	13.4478	3878.58	0	509.314	31302.3	57.7211	3.13018	14.2723	9623.7	23.2689	128.824	3.12498	54.5311	51.3507	913.903	202621	30.8381	13162.3	18.2438	31.5805
TARGET-10-PANYYV	3122	8.55342	0	14.5022	9.1794	0	1446.64	0	22.256	25092.8	0	0	0	307.538	21.1091	5.36561	1129.03	89.3303	14.5826	31746.6	2.9862	47.042	7.2025	0	7.17623	15.149	64.8339	4957.09	3.57706	13.8472	6988.31	7.19143	2.94162	16002.8	10.7868	5.42423	3.53892	11561.9	0.527925	127.923	7.8687	21.0586	7.78137	645.399	195665	24.6706	5380.89	4.15228	0.533693
TARGET-10-PAPAGK	3529	9.66849	0	30.5056	1.95777	0.112916	5037.72	1.98476	1.95915	7302.86	0.100635	0.112221	3.78069	25.6603	34.4647	11.0708	5299.83	281.573	0.112488	1325.27	0.0961981	157.978	26.7715	0.117537	16.3801	25.0615	3.81078	1361.69	0.103728	21.8063	2521.13	26.8921	3.80249	49349.3	5.61689	0.104593	16.4279	2990.78	1.97539	516.825	14.2257	43.7308	5.59832	917.419	209650	179.929	14832.9	12.7063	18.3071
TARGET-10-PAPVTA	3217	8.8137	0	5.5508	2.74875	0	1065.7	0	150.997	113088	0	0.372025	6.05993	200.544	13.5645	6.0248	4915.65	82.7645	15.1956	49732.8	4.24478	104.067	9.38955	1.30387	3.18225	5.56172	21.1268	6740.11	6.62328	15.9644	9148.96	0.836739	5.06661	18649	9.30363	15.4239	7.90202	19106.4	15.29	360.894	6.57818	25.3208	1.79649	596.102	184331	37.5397	21104	12.2517	3.18288
TARGET-10-PASTYT	2433	6.66575	0	3.90612	12.3926	6.08524	45.5346	0	6.10255	33029.4	29.5751	4.07952	55.53	561.742	2.10376	5785.84	2056.95	2.10037	0.776174	1983.54	3.45327	2.54399	6.14031	0	20.3161	4.81001	15.523	9034.09	3.91838	0.777182	1928.16	12.4964	0.349642	13948	2.55031	0.338691	9.30367	87827.2	0.338385	370.077	8.433	59.3478	2.55774	768.858	19104.7	2.54442	28506.8	16.0677	13.1757
TARGET-10-PASNJI	2225	6.09589	0	3.31975	10.5642	37.2112	46.3869	0	1.44655	34021.8	17.9724	1.80365	23.3006	512.026	1.4193	4811.37	250.28	3.28844	0.489778	3876.2	4.59649	0.501465	6.80548	0	11.7322	4.27762	11.8177	9927.84	2.69156	0.494109	1764.12	1.7314	0.198534	30065.5	2.67507	0.798066	1.73079	122860	0.489858	155.695	11.0333	20.4647	1.44134	467.948	30667.7	5.1609	33496.1	11.5765	10.1593
TARGET-10-PANEUH	4132	11.3205	0	10.0614	7.29299	0	1314.85	0.660997	7.27025	18380.9	0	0.623987	0	490.732	18.0358	8.39343	1897.28	37.9149	36.5267	58274.1	20.4114	43.7438	7.34033	0.979838	13.9231	4.34803	5.04854	6459.24	11.2684	14.074	6964.81	7.7275	33.5334	13134.3	37.2426	6.66208	21.3952	17738.9	12.1982	195.681	4.71893	26.1013	0.266844	1438.47	255655	19.5054	6899.87	8.45013	5.78405
TARGET-10-PAPESW	3542	9.70411	0	6.50647	3.31958	0.267877	558.812	0.285437	46.7211	10109.8	0.227364	0.265466	3.44715	631.905	27.6938	9.62901	3824.51	22.0425	40.0865	39271.2	11.0443	43.4985	12.2401	0.284276	12.512	0.275602	6.5991	4504.19	0.237173	0.295486	2813.79	3.48379	6.60063	12050.2	6.57081	3.35848	9.59097	10412	0.254615	179.294	3.40044	15.8474	0.326661	345.936	110688	15.8707	4871.54	9.38828	6.60036
TARGET-10-PANXPE	3365	9.21918	0	14.8587	5.7116	0.0205336	1677.34	0.0211686	13.7496	31715.1	1.17011	0.0204429	0.0204156	75.4856	29.7179	9.17279	713.498	93.7662	27.3183	1888.89	1.16887	41.1842	2.31576	0.0211279	0.0213167	6.87873	94.7421	3108.87	0.0193078	5.74582	2203.32	1.17163	0.0221876	20325.9	22.8986	0.0194258	37.6737	5166.96	1.17155	243.558	2.31322	22.8932	2.31007	826.674	290773	61.7621	3521.64	2.31595	4.60387
TARGET-10-PASREU	2402	6.58082	0	8.95135	17.3568	7.76483	27.1746	0	2.54018	6651.65	37.6501	4.2843	0	453.672	3.05795	5343.14	835.742	0.439126	0	3138.59	6.26389	3.56975	0.953043	0	33.0402	8.94915	9.37952	13365.4	5.74945	1.99821	2307.54	2.00048	1.48514	22520.8	2.52899	2.53877	6.23784	168751	1.48403	310.921	8.93562	52.9115	11.4352	1928.7	22484	4.09356	31799.6	7.82142	33.9867
TARGET-10-PASRYW	2391	6.55068	0	3.73603	24.3434	23.6987	14.4466	0	0.665899	62454.3	27.8365	1.04924	0	157.359	2.9488	2600.04	176.092	3.31676	0.644309	3332.83	2.95403	1.41177	7.23025	1.79069	34.885	2.56577	0	8622.73	3.35599	0.646889	1828.03	0.644805	6.38145	17837.7	4.08759	4.14533	2.55765	56695.1	0.644538	388.121	4.90309	42.4356	1.42498	428.954	19357.8	2.55449	23218.8	6.82142	13.2758
TARGET-10-PARSLL	2531	6.93425	0	4.26005	13.8844	41.7109	36.3176	0	6.83418	61139.7	12.4671	3.52122	8.22939	382.153	1.6186	5811.96	727.64	2.05112	0	5105.62	5.58808	1.19231	4.68117	0	25.5464	5.1457	5.96806	12043.4	2.94295	1.18579	1704.7	0.328988	0	21508.4	2.92359	1.18705	2.48793	115624	0.327267	263.202	5.13814	61.5506	38.484	802.699	26862.1	1.62309	32830.2	13.9462	15.9237
TARGET-10-PANKMB	4175	11.4384	0	8.6778	0.263021	0.284041	888.793	0.11922	26.7241	13264.9	3.25223	2.93821	0.245261	82.2825	14.1388	17.8651	2157.46	17.639	8.38354	28933	11.3625	20.6429	8.82772	0.23947	26.4417	8.68471	0.265924	4749.38	3.21154	22.739	3108.7	6.05874	15.0177	7939.83	9.18042	8.55786	6.07841	22467.6	3.14784	146.562	3.24877	23.7819	9.165	436.075	158771	43.4747	14083.6	3.2847	9.16932
TARGET-10-PANATY	4077	11.1699	0	9.88751	28.2026	31.235	35.5766	0.0356992	2.9117	59497.9	24.2229	5.53989	7.12607	119.338	2.91689	5862.05	556.621	2.92653	0.0543231	3117.89	2.91367	0.0634401	2.9197	2.91436	29.8255	11.2782	21.2236	7780.34	2.90762	0.060535	2311.44	0.0587342	2.92143	35682.9	24.2091	7.0829	8.53431	71851.3	0.0539078	302.423	8.50974	68.1587	4.33896	729.802	18995.1	14.2669	49206	1.50335	269.416
TARGET-10-PAPHPX	3632	9.95068	0	0.0396482	25.6341	68.0655	57.9772	0.0252754	25.8018	26662.9	27.0884	2.5826	0.0403907	124.897	2.62858	3007.88	238.169	3.92123	0.0376488	4273.11	0.0397551	0.0435098	6.46558	1.34346	57.8184	11.5247	11.6054	5009.3	1.34247	2.63253	2520.11	5.18715	0.0442594	32295	11.6448	1.34229	3.91143	59006.7	2.61488	350.075	7.72623	55.3687	3.91516	805.725	15914.6	3.92139	26384.8	5.19434	138.954
TARGET-10-PAPNMY	1967	5.38904	1	15.2168	3.56896	0.874246	669.296	0	82.3026	1365.46	0	0	11.6445	264.009	25.9506	11.6132	255.893	86.7875	8.04841	45314.9	2.67337	86.8017	2.66323	0	25.9756	2.66304	42.9735	11317.6	3.56704	24.1699	4873.13	24.2029	0.87652	14637.3	11.6108	8.06795	19.6865	23651.6	9.85578	106.46	1.7691	59.0636	2.66724	1385.18	188481	106.484	29353.4	10.7358	8.03151
TARGET-10-PARUBK	560	1.53425	1	5.2722	0.51643	0	1842.99	0	88.4518	1110.35	0	1.69925	0	200.293	8.83241	15.9647	1121.66	90.2777	1.1061	51328.2	6.63235	68.903	4.68328	0	11.8445	5.27979	12.4043	6960.27	9.61942	21.4046	8638.77	0	107.678	17725.2	5.86303	4.72691	1.69981	20874.2	0.51651	630.482	6.52691	44.5397	18.9378	1009.42	148751	32.5942	23937	11.8909	4.66645
TARGET-10-PAPIJB	3715	10.1781	0	5.15972	5.67889	1.00392	953.372	0	136.732	13179.7	0.260996	1.0038	0	289.726	16.1278	4.4159	1091.31	32.2801	11.749	44222.2	19.9305	31.1625	2.1318	0.634461	3.63799	1.75438	7.02923	4762.06	4.87228	17.3111	2889.73	7.45618	5.89927	7909.58	17.2025	1.00538	6.66145	7100.83	8.70926	123.108	1.38106	23.2554	0.654465	685.072	113803	25.1171	2947.35	8.23315	4.0129
TARGET-10-PARLEK	2900	7.94521	0	9.41956	5.0425	0	1219.41	0	20.7296	1305.77	0	3.08257	0	74.9753	6.85933	12.5424	320.232	54.1627	1.18611	40284.4	1.83423	35.2448	9.44366	0	3.07504	8.16217	28.3749	4100.34	7.61581	10.0301	19484.1	0	50.4214	18845.4	6.86348	5.67093	0	19819.7	1.18655	470.413	5.00996	56.7636	11.9151	875.795	100458	40.9149	17397.8	3.07828	3.70522
TARGET-10-PANZXC	1412	3.86849	1	0.232193	0.192881	10.67	316.9	3.01763	214.554	7047.29	2.89188	0.219036	0.218499	91.4145	3.02156	0.263267	5208.19	16.4549	5.58232	49518.6	7.56313	21.8096	0.224636	5.6633	10.9195	0.22658	0.247989	2149.01	5.40434	5.69843	2398.45	5.64341	45.7474	2237.55	2.98139	0.199796	0.241087	8372.38	5.51637	126.421	2.95825	5.71254	0.263692	145.218	102453	21.8205	3173.76	5.62821	5.71522
TARGET-10-PASXFY	2176	5.96164	0	2.07853	8.50285	25.5975	34.8103	0	8.48443	39560.4	68.9602	5.80568	8.53678	175.007	1.36465	5066.44	657.445	6.34635	0.656024	963.412	0	2.78653	10.6885	0	51.3067	9.27635	12.0781	8430.65	2.79786	2.0749	2403.64	27.3027	2.07983	26404.9	6.34295	3.51786	6.37244	47298.7	2.08681	302.407	4.94532	25.5592	19.1499	485.951	20350.1	7.05499	22091.4	11.3924	16.3037
TARGET-10-PAPHGD	3579	9.80548	0	10.8635	1.21167	0	1713.95	0	17.2186	26216	0	5.073	12.8717	69.7534	8.89665	8.90242	5035.17	21.6989	0.571854	46928.4	9.14508	33.24	10.8922	0	11.4926	1.84711	1.21244	6446.59	9.70995	20.5034	2600.35	0.572837	39.6679	9649.61	15.9359	5.10839	2.48677	26248.8	1.20848	94.0755	4.44135	71.1518	1.22328	1504.59	81008.4	35.7961	11824.1	12.8286	3.12748
TARGET-10-PANLIC	4015	11	0	13.9398	1.49289	0	1040.92	0.744094	1333.16	26339	0	0	0	58.4608	10.8032	14.5897	2198.08	19.2431	2.27215	62178.5	7.7001	88.7766	0	0	7.6502	1.49363	3.03157	16038.9	5.37568	41.0521	3475.98	0.725263	0	11991.6	40.0141	3.04346	3.03518	27648.6	5.39564	157.785	3.81252	73.9098	6.11351	862.249	336000	39.2974	26432.2	8.45187	7.65159
TARGET-10-PARWVN	2817	7.71781	0	6.27173	14.4512	0	1176.9	0	217.417	12727.7	2.6814	6.27827	1.77627	119.482	7.16638	2.67831	3282.8	10.7596	0.878526	41831.5	4.49565	95.2406	3.57422	1.77597	13.4699	0	0	581.246	1.77809	11.6655	2173.22	0	55.6984	1786.91	43.1025	1.77784	17.0653	8653.41	2.67667	261.424	3.57841	57.5027	5.37337	1211.06	49170.6	17.9461	2727.53	9.87785	1.77684
TARGET-10-PARDWN	3010	8.24658	0	3.18951	18.414	7.56092	22.9659	0	1.36033	30567.8	17.0953	4.14058	21.282	243.274	3.55395	4506.81	650.678	3.52951	0	5058.42	1.70375	0.979661	5.40929	0.60796	24.8668	5.8153	11.3076	14571.5	3.57537	3.90594	1615.09	6.91314	0.98587	25501.9	4.26668	2.0795	2.06823	102872	0	303.383	5.42948	31.03	18.5506	544.046	24010.9	1.34295	15901.5	9.50282	22.2158
TARGET-10-PANEPX	546	1.49589	1	12.1988	0.0144766	0.0155894	1579.8	0.0160608	248.323	76947.7	0.0143599	0.015522	12.1801	95.3547	4.45748	12.2149	773.845	24.4133	3.34593	178736	13.2036	59.8749	2.23928	0.0160307	12.2044	2.2394	6.6746	16525.1	8.84572	32.121	8165.03	0.0158995	96.4227	39053.7	22.1961	6.64683	9.99479	22430.9	13.2699	259.432	9.96009	82.0114	0.0170463	1109.73	201810	26.6301	13811.3	12.1918	23.2891
TARGET-10-PARNMF	3157	8.64932	0	4.44178	4.05687	0	1235.35	46.9693	830.52	1939.9	1.2601	0.353735	0.353666	311.879	11.2755	7.63606	3977.58	75.4434	2.62081	45392.9	7.4548	17.6228	3.9926	0.803481	13.1548	4.90878	9.89984	4685.53	4.9833	14.0476	3041.61	14.5965	629.607	12554.2	9.8959	0	9.46218	16244.1	5.87461	280.143	3.09314	11.2547	25.8244	568.953	87439.6	14.4383	8223.89	10.4476	11.7247
TARGET-10-PAPRCS	460	1.26027	1	5.79485	0.583643	0	1734.17	0	53.2854	65394.2	0	3.84355	2.53394	119.062	9.04226	10.9985	468.448	83.9111	1.88085	26355	1.23846	47.4564	9.75085	0	9.05934	5.80254	48.2585	4471.11	5.86215	18.2122	7787.32	10.3928	37.697	19013.5	9.03969	0.583414	14.9384	21470.1	0	182.793	1.23136	44.8837	33.77	1538.39	156506	98.2552	5699	18.3086	5.78207
TARGET-10-PAPTAT	3262	8.93699	0	2.22538	7.73484	9.94689	88.2547	0.009532	3.32661	47012.5	8.84246	2.21257	37.3431	115.825	2.22598	6252.34	395.965	3.3303	3.32048	1374.24	0.0144455	1.12214	11.0225	0.0144778	36.3903	11.0107	15.4389	8566.29	3.32405	1.12314	1815.41	5.52742	0.0158999	37281.6	14.3593	6.61605	8.82592	47230.9	0.0136644	456.588	6.62359	26.49	16.5658	639.7	26198.5	4.4334	31352.4	4.42979	152.177
TARGET-10-PARPZJ	2419	6.6274	0	4.24805	0.287252	0.33977	448.683	0.365518	123.592	7334.39	3.93363	0.336277	4.16755	115.941	8.00355	0.427224	1926.85	19.2564	4.17592	41538.1	3.83279	11.7817	0.347202	0.363798	22.043	4.21872	4.28967	1733.2	7.24946	7.95705	3013.83	0.356439	48.7333	4810.13	8.00391	0.299904	4.28064	8140.87	30.0709	79.0081	7.44276	8.04127	0.428152	392.614	56004.8	15.5192	6370.88	0.351328	4.28961
TARGET-10-PAPFWH	819	2.24384	1	13.6972	7.28114	0	1520.27	3.18238	215.923	62361.4	0	0	6.42668	97.4633	6.40472	10.4383	302.886	21.7108	4.80445	132149	14.7167	13.6543	3.99243	0	14.4945	0	0.770395	8378.9	12.1765	45.2305	6411.46	0	56.392	12847	17.6829	0	6.40693	32401.3	13.7629	318.223	13.7735	32.2012	4.8015	1050.58	337759	16.8768	13962.9	10.4684	50.01
TARGET-10-PARARJ	455	1.24658	1	5.44006	3.26452	1.1017	1466.84	0.0125695	14.1214	11009.9	1.10088	13.0051	5.43556	37.9906	4.35769	16.2901	71.6217	79.2092	13.006	21282.1	0.0108967	19.5468	21.6617	0.0125463	31.4292	3.27155	7.61213	4183.51	25.9013	17.3623	2803.48	5.43925	59.6714	26836.9	8.6965	9.74299	6.52623	14892.9	20.5497	159.501	3.26836	34.7276	16.2893	1093.61	124332	82.4609	32263.7	2.1872	6.52753
TARGET-10-PAPJHB	1870	5.12329	0	4.52129	4.55869	0.715126	1385.5	0	7.56722	43298.3	1.47864	5.29669	13.7536	45.6277	2.23511	7.57049	59.335	67.7203	0.715078	134171	6.13487	4.52018	3.76136	0	12.1595	0	9.84966	11914.1	16.1767	13.6782	4729.03	0	79.9667	44709	5.28342	0	0	22757.6	16.1022	112.619	4.54064	15.1761	12.8993	677.506	191088	44.8721	28975.8	2.99698	7.56287
TARGET-10-PAPDWT	3470	9.50685	0	12.6848	3.23547	0.0814719	1145.19	0.0846797	9.61672	3012.55	0.0733738	0.081018	17.2063	6.44817	12.7647	4.85144	3.2613	126.678	18.7618	11069.5	0.0704038	39.6901	7.96993	0.0844727	3.28776	12.6451	28.5074	6480.98	9.35997	14.3092	6837.29	0.0835755	309.208	123981	103.004	4.78903	8.0246	5562.51	0.0789326	304.14	10.9613	23.8589	3.26349	1026.32	360807	162.985	19351.1	1.70035	55.2101
TARGET-10-PAPIYG	3488	9.55616	0	1.44379	11.331	20.7001	51.609	0	11.639	47647.7	52.777	5.72596	1.05172	359.063	1.44258	4313.94	586.992	1.05713	0	2616.73	2.62954	0	8.60471	0	28.9816	7.04276	3.40042	7606.71	0.663073	1.44202	2883.68	4.61	2.23437	17837	3.79544	0.278992	1.05184	78328	0.66388	250.382	10.6621	43.4185	88.1344	838.275	21729.9	5.74877	26130.5	9.38023	28.0909
TARGET-10-PASFXA	645	1.76712	1	7.43154	2.781	0	2335.8	0	2.7785	62824.5	0	2.77718	24.2375	95.805	18.598	13.0102	13573.1	246.546	0.916544	7065.97	1.84975	67.9032	9.29914	0.91676	14.8815	8.36582	86.5777	2649.26	2.78012	20.4663	2805.54	115.65	10.2174	23884.4	29.7521	2.77976	5.56717	14599.9	3.71014	72.5423	4.64351	60.4695	10.2203	1266.97	142667	75.3416	6262.25	17.6901	5.5665
TARGET-10-PARUFL	2859	7.83288	0	5.115	17.1056	20.7315	46.4491	0	9.89566	44355	40.2483	2.93637	0.330611	183.669	3.36091	6710.86	101.695	3.80905	0	1660.55	2.09544	2.93771	6.45299	0	28.46	6.4472	0.766312	19434.8	2.07441	1.19354	1993.82	0.332353	0	25855.7	2.07596	0	2.49165	71832.6	1.62603	186.548	8.75765	43.0381	47.744	650.356	34265.1	3.80796	39802.9	4.68488	27.3972
TARGET-10-PAPJIB	1344	3.68219	1	53.7877	0.319938	0.382728	903.728	0.414081	4.70477	14252.6	0.314114	0.378503	0.377246	4.72074	83.6791	13.0077	443.983	602.153	33.7383	804.318	0.292067	41.9138	0.391738	0.411975	4.74593	19.8164	0.449913	298.917	0.330277	0.432499	2428.36	0.402981	4.76387	20338.5	13.0774	0.334926	59.2677	348.575	0.359717	921.908	8.15403	45.7089	8.82523	245.114	153080	213.909	7192.79	0.396754	21.0288
TARGET-10-PAPBCI	3085	8.45205	1	4.68428	2.80921	0	1924.39	0	371.001	45434.1	0	4.68667	4.68679	26.2841	13.139	15.0156	1554.35	46.948	4.68652	21115.7	0	75.1344	3.7453	0	9.38336	5.6255	12.1985	6273.77	5.63511	13.1418	9947.89	0	82.658	36057.3	13.1359	0	3.74397	15447.7	0.927261	69.4866	6.57307	30.0453	6.564	984.267	152056	6.56209	15989.7	2.80526	5.62219
TARGET-10-PANWHW	1916	5.24932	0	0.123246	13.5472	0.140591	592.184	0.0703584	15.6678	1710.76	0.146194	5.51235	0.126333	56.319	0.125685	7.89146	19.5157	32.66	3.94691	53339.4	2.11076	13.6979	13.3976	0.124097	6.00217	5.87618	5.97322	8520.07	16.8124	19.1438	3291.59	2.11636	0.143102	24536.4	765.062	9.50836	30.0738	24107	3.93857	93.079	2.11271	42.7037	2.09971	2387.28	155417	211.752	37847.4	9.70873	46.6025
TARGET-10-PAPLTZ	2585	7.08219	1	16.8494	0.160114	2.75136	2046.24	17.714	26.4627	40081.6	0	0.44237	11.6567	35.4321	16.696	5.08484	6738.88	199.563	5.69637	2975.59	0.159925	87.1165	13.3814	0	10.6206	7.7359	21.6379	5501.89	3.08345	14.6928	3852.83	1.01347	17.4996	29391.4	13.4478	2.48334	19.0911	2883.59	0	428.195	3.6558	28.5336	4.22132	978.11	144027	136.94	3979.17	7.44017	30.3892
TARGET-10-PARSGC	2829	7.75068	0	6.33346	0.22331	0.258372	907.029	0.274962	51.4636	17038.1	0.219928	3.35563	0.25541	188.866	9.38449	0.313168	1909.47	24.4469	20.086	82125.3	3.15866	24.4247	3.37422	0.273866	9.28853	3.37991	0.293209	2801.44	0.229258	32.4871	2525.23	0.269156	12.434	3320.91	21.4457	0.231909	3.40669	10376.1	3.32348	87.4967	3.31055	27.3335	6.34197	243.613	70703.3	21.4446	3278.89	6.28966	9.40209
TARGET-10-PARFWD	3191	8.74247	0	1.72628	28.675	1.72569	50.0051	0.0494157	0.0952343	19996	1.70998	1.67851	0.0839663	106.318	8.05652	1992.11	751.515	3.34459	0.0773645	1100.71	1.72668	0.0916752	6.49997	0.0826611	22.5901	14.265	22.4013	3253.66	4.87876	1.73083	2820.77	19.028	9.78471	37436.5	88.3202	3.3068	1.72959	72467.5	0.0767229	255.893	4.9034	184.615	27.484	1015.32	14338.5	9.77448	28913.3	4.92807	659.521
TARGET-10-PANFNZ	2778	7.61096	1	3.68712	3.69541	0	1203.19	0	569.27	84769.2	0	2.7622	3.68909	28.6756	8.31504	7.39116	343.359	42.5603	0	88260.4	4.6312	58.3024	2.76168	0	10.1715	3.68779	1.83636	14135.8	7.41297	29.6332	9298.91	0	4.61252	35869.3	70.3286	4.6224	2.76105	16848.5	5.54683	157.328	1.83663	110.177	0	304.487	411142	18.4947	9805.15	10.1782	53.7082
TARGET-10-PAPZNK	883	2.41918	1	16.6027	4.24131	0.147364	2587.29	0.154522	2.27211	31097.5	0.12987	2.29585	2.29532	4.37435	10.6293	6.44934	1087.32	73.1679	0.146747	607.409	0.12365	58.5216	0.149471	0.154056	8.5134	4.36834	6.48631	607.446	0.134236	12.6508	1938.71	0.152043	0.166565	31061.9	60.7106	29.3754	35.1065	498.91	2.28658	727.82	2.28259	101.783	27.3324	238.113	67388.6	120.944	4211.09	10.466	23.0362
TARGET-10-PAPDKJ	1456	3.98904	1	4.07433	0.629628	0	807.886	0	83.3559	25757.7	0	1.31559	4.08445	24.75	14.4321	2.01696	3002.97	73.0347	0.629712	6352.49	0	46.1448	5.46706	0.630976	8.91588	3.38548	17.1927	2773.29	1.31838	24.1577	2620.94	1.31571	18.5493	18071.2	8.21043	0	9.60054	4714.55	6.18641	168.15	0	4.76113	0.639948	281.198	73182.3	50.272	2636.78	8.93915	25.4925
TARGET-10-PANZPJ	953	2.61096	1	0.182212	0.154226	0.174242	623.613	0.183362	50.8806	26949	0.152241	4.79258	0.172591	32.4811	2.55998	7.12866	1966.66	7.15926	0.173459	69264.5	6.63079	11.7785	4.81596	0.182767	7.12544	2.55565	0.193142	3153.74	4.68052	11.6761	2417.71	0.180196	23.2494	3441.33	7.15408	0.15923	7.14506	8338.36	2.5331	191.133	2.52747	14.0711	69.2765	428.076	85874.8	0.201056	4989.33	7.06291	0.193453
TARGET-10-PARPNM	233	0.638356	1	4.5096	0.137856	0.154872	1463.53	0.162557	0.178647	19649.2	0.136157	0.153798	0.153476	8.81166	21.521	2.33445	178.34	58.1226	0.154211	603.171	0.129526	23.8383	16.905	2.37567	4.5196	8.67656	0.170751	491.624	0.140819	13.0065	2984.96	49.8797	6.67628	11100.4	32.4323	0.142129	6.65793	1749.06	2.35513	420.535	6.47206	25.9371	6703.06	382.176	46851.4	199.078	2523.7	6.59331	10.9467
TARGET-10-PAPJHR	1186	3.24932	1	13.5013	3.06239	0.0701174	1632.05	3.10221	1.5839	7818.2	0.0633897	0.0697417	0.069629	4.59341	29.9641	4.58541	346.613	203.828	4.57842	1339.61	0.0609088	43.5747	13.4506	0.0725967	0.0733909	13.4641	0.0755237	3394.61	4.53359	4.60327	2592.11	0.0718562	1.59039	109754	9.10065	0.0655799	23.9544	771.105	0.0680136	304.543	10.4083	28.5755	9.08648	139.61	279951	360.891	3891.15	0.0713323	25.5234
TARGET-10-PARLAF	2939	8.05205	0	8.43735	0.786332	0	1147.03	0.788229	654.745	3432.7	0.343744	2.57676	2.12648	288.6	13.7965	8.40837	689.406	56.7712	11.6983	21750.6	0.789268	39.7593	11.2058	0.347818	7.96911	4.37593	2.57245	8498.64	6.75844	9.76081	7016.15	15.7329	496.436	22595.1	11.0796	2.13925	16.0851	10048.1	1.23075	114.954	3.95426	19.5941	0.807307	1610.2	134417	76.9621	6634.5	18.0444	18.2865
TARGET-10-PAPLDM	3280	8.9863	0	6.13541	4.55758	0.0717655	1233.96	0.0744943	0.0800035	3866.63	0.0648436	0.0713788	0.0712628	36.4	6.15499	3.10987	178.538	125.485	37.1018	5177.65	1.59503	25.8093	12.0721	0.0743184	4.63891	10.5967	34.7331	5201.76	1.60605	15.162	9712.23	0.0735559	3.12365	63556.2	75.6859	3.09753	19.6553	2907.94	1.61137	260.146	3.10792	10.6943	0.0803388	108.982	190216	398.474	3918.04	4.62709	88.731
TARGET-10-PAPDUF	3669	10.0521	0	24.4311	15.6418	0.144597	1488.92	0.151564	2.2466	49724	0.127545	0.143621	0.143329	12.6103	57.2283	2.24007	863.348	195.835	33.8467	2461.64	0.121475	76.4072	10.339	0.151111	6.38909	24.2696	2.27475	840.667	4.22041	20.628	2397.6	0.149152	0.163275	74001.1	47.7076	2.24533	18.6022	696.092	2.26138	1095.57	17.9032	18.7917	0.166988	117.93	201703	105.299	4538.99	4.32225	26.8763
TARGET-10-PAPGFP	945	2.58904	1	6.12433	0.214007	3.24803	624.459	0.262258	249.44	19131.7	0.21083	6.02089	14.1135	35.2363	11.9308	6.1349	4242.74	12.0084	0.245504	62696.6	0.198595	86.9846	6.06823	6.12962	11.794	0.25362	3.28602	5863.35	0.219588	6.17584	850.89	14.4023	6.19673	20687.4	32.336	3.16609	20.2916	12661.6	0.23509	261.458	3.20161	20.6741	26.4828	450.258	67934	3.25119	1654.92	3.26443	17.6714
TARGET-10-PARFLV	334	0.915068	1	20.9284	0.0945791	0.104684	1313.09	0.109145	3.64968	55722.7	0.0935526	0.104056	5.3717	10.7008	31.5646	8.9241	722.568	131.778	0.104297	1406.31	0.089515	58.0723	3.65692	0.108856	0.1102	5.39573	26.3851	1731.5	1.89131	12.3981	2540.01	0.107606	12.4659	45846.1	30.0442	5.30147	17.6033	1409.84	0.101174	469.242	7.03187	42.235	93.3206	400.903	123692	84.418	5856.82	12.282	71.5729
TARGET-10-PAPISG	3491	9.56438	0	0.173605	0.147425	0.166168	1540.35	0.174678	4.69419	67764.5	0.14556	0.164981	8.9495	6.94642	35.567	2.43923	1379.45	185.211	11.0946	686.522	0.138297	64.9026	4.67928	0.174122	0.176713	13.3337	33.4463	791.635	0.150679	13.5447	1408.63	0.171725	2.46666	38975.9	11.431	0.152119	20.1048	923.505	2.45872	174.59	10.9233	15.8998	11.394	264.053	94380.9	167.325	3968.28	6.86668	22.4578
TARGET-10-PANKGK	2034	5.5726	0	13.1862	1.01753	1.01737	1550.41	0.00139394	576.325	73535.2	0.00229825	3.04366	0.00210104	92.3381	18.2569	3.04635	2259.67	45.6521	2.03184	67912.9	1.01755	107.535	5.0755	1.01756	6.09115	1.01755	1.01751	9514.57	1.01753	24.346	4348.88	1.01756	6.09112	18626.3	30.4422	2.03206	2.0323	10032.1	3.04579	163.364	6.08921	91.3189	2.03194	643.303	262454	11.1642	14177	10.147	17.2526
TARGET-10-PASRWZ	2448	6.70685	0	0.0700051	25.572	9.19776	41.0196	0.0427903	36.4817	34689.8	77.3965	0.0565782	0.0714772	137.993	1.61671	3176.36	228.943	0.0766209	3.09554	5119.25	0.0702166	1.61457	1.61756	1.61581	63.4279	7.57688	4.64714	4320.6	3.11101	1.61835	2299	3.12594	1.6096	18392.9	7.68692	4.59385	0.0721721	68094.5	0.0655477	219.8	3.12152	78.7858	1.6047	1018.37	11149.2	3.13679	11838.7	4.63476	133.283
TARGET-10-PANSUL	1068	2.92603	1	5.0572	0	0	679.899	1.24829	135.654	17853.7	0.562105	12.1761	13.9626	134.336	7.11745	3.68823	5341.62	34.747	4.38265	56673.4	1.97491	28.8835	5.42398	0.22946	11.3292	1.24686	4.00489	3958.19	8.41612	16.5424	3329.96	11.3809	79.523	9441.89	7.12369	1.25067	13.0503	11937.2	5.11311	150.109	3.34984	18.8673	4.72579	308.277	100271	26.4543	6874.1	5.06836	5.38562
TARGET-10-PANWYH	1418	3.88493	1	5.81281	7.70284	114.974	57.0617	0.0965628	8.31758	55786.1	15.8567	4.2197	6.8018	527.547	1.90239	6085.92	238.039	4.65657	0.313286	2964.24	0.99641	0.329692	5.60378	0	27.6895	4.89956	5.09747	14315.9	2.85957	1.67226	2543.69	4.89298	0.328365	15559.3	3.06336	1.21766	3.03937	58737.5	0.311619	74.6573	8.29577	19.3004	35.3171	500.074	30445.4	3.97093	37814.5	6.29588	8.07719
TARGET-10-PANRWG	3769	10.326	0	5.07056	1.40172	0	1685	0	397.056	4281.6	0	5.18155	0	93.911	14.6498	5.05537	483.62	48.2438	0.676104	73614.3	6.54288	41.5778	10.9432	0	11.602	4.33404	0	3038.91	8.03669	21.9422	9217.58	0.675977	21.8021	5187.03	5.04239	51.1952	1.40153	20038.8	8.82152	254.196	0.675816	76.4898	9.4133	1080.25	164883	13.794	14016.2	5.78732	0.682953
TARGET-10-PAPIJM	1203	3.29589	0	3.53304	5.92532	1.12381	905.323	0	247.6	24703.9	0	3.00795	0	119.83	15.7308	6.53017	317.062	45.183	6.01825	40578.1	9.02169	48.0899	5.33987	0	13.1154	3.53256	48.3837	6205	9.05353	17.4548	6141.59	0	28.7156	42946.3	28.7162	1.11908	4.73318	17451.4	2.33558	90.4432	5.96106	19.6999	4.12055	387.213	237867	15.5259	10271.5	10.1854	4.11957
TARGET-10-PANSBR	1688	4.62466	1	13.0279	3.46095	0	2120.36	0	1186.9	39992.3	0.843536	5.19372	0.842975	88.5843	10.3996	2.5841	732.239	13.0017	1.71062	100246	9.62592	43.4125	6.93387	0	28.7077	1.71038	0.844652	6461.83	6.08425	33.918	4456.13	0.843267	13.8702	12535.3	25.1621	3.45769	52.2192	12974	12.194	372.646	8.69858	21.6919	49.4861	480.336	301814	34.7193	14613.2	8.67579	10.3981
TARGET-10-PASXZH	2245	6.15068	0	0.754636	11.916	88.6919	58.0874	0	6.44076	25272.6	100.796	5.64557	4.67462	365.304	2.55027	2360.29	443.027	3.13575	1.055	2574.64	4.07869	0.766058	7.72142	0	12.4092	6.23158	14.0239	8075.45	1.35137	0.757626	1446.12	2.24674	0.477208	19451.4	1.36389	1.95623	5.27508	79877.6	2.89572	231.959	10.8505	17.4691	20.4533	535.626	28472.6	1.35685	16806.7	7.39263	5.23654
TARGET-10-PAPNNX	846	2.31781	1	6.79507	5.97482	0.823542	3451.95	0	138.912	26368.2	1.67841	2.52785	0	184.972	5.08263	10.2011	416.752	20.4237	0	54989.2	6.85628	65.6205	2.52702	0	6.79204	5.94391	1.67569	11193.6	5.9694	15.3305	2577.39	0	21.2788	8192.47	686.41	6.82727	5.08348	17549.3	11.1084	237.777	1.67563	120.266	220.72	646.892	62341.2	40.8834	28672.1	15.3625	35.811
TARGET-10-PANVYR	517	1.41644	1	6.05734	0.617493	0	1061.51	0	213.95	12638.1	1.29778	1.97235	22.6245	103.204	6.04516	12.1661	228.815	10.1209	0.617633	34439.8	1.30124	17.5898	6.06788	101.542	18.3545	0.618195	0	1786.85	5.42983	18.331	3296.01	123.075	23.7103	5567.16	6.05056	0	63.5044	24451.1	3.34265	200.306	2.65942	14.1956	3453.5	1793.13	53252.3	26.4199	3513.32	10.8625	5.36497
TARGET-10-PAPGYC	2003	5.48767	1	8.3252	1.03125	0	1149.38	0	61.9352	36596.1	0.474668	3.83456	0.4754	87.6725	17.274	11.0952	463.706	50.7715	11.7816	50494.6	6.81942	27.8529	4.3919	0	11.692	5.51692	20.6332	4539.07	5.58769	15.6151	7171.66	2.70265	11.0807	13333.4	4.38771	3.29277	2.1436	10841.7	13.5587	130.669	4.41829	34.5945	1.04693	1314.9	210108	6.0586	17157.9	10.6077	6.61199
TARGET-10-PARPRW	442	1.21096	1	13.6499	0.515559	0	3664.98	0	8.22927	47271.7	0	9.50158	10.7117	16.5284	27.3095	8.23505	1257.35	211.998	5.28424	3335.39	0	102.118	33.6294	2.88216	17.8179	10.6739	78.6612	771.327	7.16251	20.1815	2041.2	15.4701	11.7803	48881.1	17.1215	23.6974	15.9963	2117.74	1.10477	915.271	0	48.0552	1.1216	736.363	84048.6	147.833	4576.78	17.2957	12.3875
TARGET-10-PAPGNC	1914	5.24384	1	2.77111	2.68425	0.196023	582.387	0.206884	304.342	37495.9	0.170097	0.194515	2.75145	17.6527	7.72537	15.1387	295.075	15.1764	0.195094	70604.4	0.161082	15.1779	0.199204	0.206172	5.23877	0.200828	10.1915	10898	7.29336	17.3995	5526	0.203105	37.3473	21408.3	32.5162	0.178292	2.77518	10267.1	9.75334	492.744	2.72789	22.5573	2.71736	941.283	146008	27.5565	4778.3	9.9754	7.73364
TARGET-10-PASCIU	977	2.67671	1	6.50149	1.43678	0	1334.78	0	22.7839	3531.77	1.04525	3.38225	16.5261	179.886	7.64287	11.151	2293.39	26.2782	2.9886	53773.1	5.9324	57.4232	16.8469	0.27904	18.285	16.028	11.1477	4340.43	4.62508	18.24	4058.48	37.4682	304.189	10491.1	6.48304	3.41552	7.26269	19574.9	9.38316	250.038	3.39946	108.66	1.45493	513.719	99299.9	20.4516	9045.2	13.6431	4.91791
TARGET-10-PARFTR	465	1.27397	1	3.09974	2.20503	0	1365.11	1.2669	529.501	22894.9	0.811348	4.96928	5.90423	283.83	9.07238	5.87131	1764.37	43.9485	4.96776	36417.7	8.00738	53.1704	11.0217	0	9.09919	4.95414	3.0988	1791.82	6.93099	13.2477	2202.99	0	26.5179	5508.75	43.9414	5.49579	27.6274	15580.4	2.65316	98.0849	4.52741	65.6812	1.748	1570.87	36414.9	7.6901	3191.86	5.88231	15.5179
TARGET-10-PANKDT	3859	10.5726	0	8.61183	0.0638106	0.0666829	978.688	0.0371782	56.2292	17647.9	5.83619	0.0488224	0.0612194	59.1083	4.38375	7.26769	642.017	11.5773	0.0567465	31262.6	8.61578	53.0799	7.23211	0.0603395	4.41032	0.0600811	0.0642195	1758.97	2.94937	20.0384	6864.12	0.0613995	63.2962	2023.81	18.7976	4.36312	1.52652	8836.23	18.2205	191.497	4.38048	41.8049	40.3884	315.308	93656.7	28.7878	7916.49	2.96502	1.51579
TARGET-10-PARIAD	510	1.39726	1	20.921	0.273988	0.3226	2920.35	14.3195	14.8228	5674.34	0.269394	0.319381	7.32819	4.04264	100.084	4.00823	901.408	400.845	0.320616	443.768	0.251876	251.092	4.02847	0.34468	14.4151	33.5745	0.372794	218.577	0.282107	7.6194	1094.56	14.175	14.8401	23006.4	7.65273	0.285742	24.7628	969.377	0.304977	763.973	0.299832	25.4527	64.8865	232.942	34533.1	160.262	293.629	10.7875	35.5397
TARGET-10-PANKAK	1095	3	1	13.4235	4.63164	0.935518	1191.6	0	578.187	8082.33	0	0.935406	9.82816	109.419	15.9446	8.17487	2074.57	45.8609	1.96623	41639	4.67377	82.107	10.322	10.2825	9.74538	1.96474	5.57624	5009.28	8.35169	13.3717	2677.03	1.96445	101.86	25199.3	72.2062	0.936279	1.45174	27659.2	1.96962	157.385	0.93546	88.9582	1.98681	752.227	151024	22.6138	12731.3	22.9294	6.0927
TARGET-10-PANUHA	4017	11.0055	0	19.016	0.0601691	0.065816	1380.42	20.48	60.3051	25246.2	0.0595877	16.0117	0.0653645	20.6596	54.1003	7.42507	1969.24	350.502	30.365	1603.67	0.0572861	44.123	24.701	39.2692	17.6069	7.39654	20.604	951.678	0.0611754	13.2682	2440.7	3.03105	7.44146	52440.8	72.0315	0.0616174	37.9889	1257.12	0.0638704	1093.62	1.55867	44.0794	4.48334	132.264	71453.5	416.338	5321.87	5.94477	58.5346
TARGET-10-PAPMYD	692	1.89589	1	8.46192	5.40743	0	1270.47	0	40.0879	40022.3	0.728121	6.15031	23.3146	155.928	8.44535	17.7094	664.535	40.8642	4.59532	26472.9	3.06988	108.1	6.14363	10.0122	4.58496	3.81564	6.89889	3246.46	7.75097	11.5468	2058.54	45.831	16.9336	12469.5	274.112	2.27585	28.6038	6320.81	11.6284	76.3658	3.04934	140.664	1.50699	2393.71	71310.9	20.7913	3202.45	12.358	33.9774
TARGET-10-PANJWJ	3684	10.0932	0	4.89058	2.07014	0	870.486	0	677.264	50289.2	2.07162	2.06042	2.06054	87.5802	7.71316	10.5457	112.999	13.363	0.650147	75901	7.87875	69.9438	0	0	7.72375	0.650646	0.653945	6873.88	9.98181	12.6838	7760.72	0	305.152	16803.8	25.3742	20.0964	7.00966	26815.8	3.48562	248.688	7.78553	38.8374	2.77841	827.414	156604	50.8268	23572.5	11.3059	49.5496
TARGET-10-PASKAY	487	1.33425	1	7.82517	0.0153924	0.0165808	3697.01	0.0170845	14.5262	66907.3	0.0152679	10.036	0.0164872	54.686	15.6333	29.0285	2677.39	153.934	1.13843	5663.86	0.014771	185.114	6.70767	0.0170523	22.2944	8.93309	13.4067	1634.36	3.36129	11.1723	2570.33	12.2715	4.48578	32397.7	12.2955	1.13784	3.37097	8739.52	0.0161756	177.399	8.91286	39.0556	8.94465	2454.22	58521.5	107.094	5263.36	12.2679	11.1778
TARGET-10-PANSDA	1141	3.12603	1	2.23867	0.125462	4.23577	985.566	0.147028	71.3162	8568.09	0.123969	2.2311	4.22904	176.657	4.27842	6.27472	81.4682	12.4077	0.139773	32449	2.17043	38.7734	0.142316	2.23886	8.28892	4.25067	0.154119	5522.31	6.07489	22.2941	2820.22	4.25685	270.462	5319.33	4.25417	2.20763	16.3142	33572.2	2.22276	209.431	2.21915	18.4875	8.30399	550.766	126458	16.4759	6627.73	14.129	6.31114
TARGET-10-PARNSH	2029	5.5589	1	25.5776	0	0	1748.61	0	2582.23	94773.5	2.96773	3.70325	0	69.6628	25.4846	4.45431	89.8932	59.9216	0.701099	146576	8.34704	88.4577	14.2746	0	10.463	5.95831	4.44383	18792.9	9.81669	32.2981	5624.38	1.44797	5.19489	18879.5	11.1911	22.0416	6.6968	22896.2	1.44878	198.581	5.98402	53.9701	153.596	931.64	298194	27.6793	16640	15.0226	7.44272
TARGET-10-PAPBSY	665	1.82192	1	13.9467	2.47889	0	1084.89	16.4984	201.527	14592.8	0	3.73771	13.38	107.068	13.2509	13.8737	2275.74	56.9751	4.3763	15656.2	0.564441	149.077	7.56893	1.19396	13.2848	3.09502	1.82833	2479.72	2.47488	25.3939	3706.65	61.5503	6.26032	26687	7.53225	9.59696	16.4571	12964.8	0	119.699	6.32587	47.5194	257.22	2187.82	93352.7	60.1526	7461.47	15.9026	2.46008
TARGET-10-PARACA	806	2.20822	1	16.2028	0.15714	0.177713	3054.15	0.187101	0.206958	34104.6	0.155102	7.08866	2.57833	7.24328	59.7333	4.8832	882.597	123.343	0.176908	645.124	0.147174	60.6351	9.37278	0.186488	2.59566	4.8826	0.197179	426.316	0.160701	9.52934	1462.33	2.59135	2.5775	30374.9	14.2469	0.162279	32.2349	896.582	0.17046	560.824	0.168299	28.1398	4.87745	305.26	51041.8	100.117	684.726	4.88317	41.6765
TARGET-10-PARJSR	853	2.33699	1	17.6963	4.51714	2.46618	1563.11	0.173896	4.68149	16718.5	0.144957	6.79754	0.163908	20.3313	9.15407	20.3052	98.348	73.7311	4.64865	8883.39	0.137734	53.6465	4.667	0.173344	6.90541	2.47203	0.182939	6573.1	2.42649	33.0939	7391.24	0.170963	33.6285	88678.6	33.708	0.151478	9.12487	8939.09	2.45204	283.291	15.0488	64.5365	6.89767	136.277	309734	107.001	23578.7	0.169289	33.3778
TARGET-10-PARUGP	289	0.791781	1	10.5428	5.21709	0.211396	2205.29	0.223566	8.11683	15560.4	0.182557	0.20971	7.88715	10.741	76.6228	8.09528	336.234	148.211	0.210357	802.249	0.172598	119.405	15.3585	0.222767	0.226501	30.1017	15.8582	500.255	0.189638	0.230441	630.453	2.91837	0.244562	29339.2	28.9866	7.65713	43.4102	760.606	0.202073	741.422	5.33937	41.7716	0.251367	557.455	44967.2	272.157	653.857	0.216915	155.389
TARGET-10-PAPDJM	722	1.97808	0	16.7419	17.9695	0.301985	1301.12	0.323244	0.370866	3381.33	0.253714	0.299083	0.298217	14.0473	78.9867	3.78812	51.2525	225.923	19.3151	786.36	0.237684	108.013	10.2137	0.321831	0.328456	19.6448	13.9416	1270.87	0.265305	0.335503	1934.8	7.10286	0.361276	46914.5	68.1556	3.67158	13.7937	390.006	0.286067	1227.23	6.81992	0.359095	3.78002	176.675	178192	151.954	935.466	3.82505	53.3727
TARGET-10-PANJPG	4072	11.1562	0	10.4805	1.14809	0	1750.55	0	308.297	28444.7	0.550476	5.01296	0.539015	52.0079	9.20658	2.38986	652.622	17.7558	3.01398	40616.5	1.76102	36.2079	6.08315	0	2.98424	1.76117	4.82672	8140.42	3.62359	14.1187	3163.48	0	4.21061	9220.82	39.1873	1.76378	0	12175.4	8.05815	132.914	1.14738	29.3436	0	911.287	182377	25.1081	27266.8	14.1447	8.49957
TARGET-10-PANRDC	3832	10.4986	0	16.9812	3.97866	0.768202	2165.04	0	262.775	5191.9	0.771745	4.87247	0.765366	31.298	16.9577	6.397	920.888	43.4926	4.003	75004	5.60784	59.5662	11.2649	0.765297	6.38678	4.79847	3.17352	8021.34	2.37543	43.6264	8042.33	0	12.0118	24070.5	32.1171	20.2773	8.83458	10301.9	8.89858	322.234	5.60554	74.7353	7.19272	816.424	353883	8.79944	9941.88	17.7314	7.19222
TARGET-10-PAPECF	1290	3.53425	0	25.1243	0.210238	0.242153	1214.05	8.82836	11.8205	32687.2	0.207143	3.19686	5.93644	0.288626	42.422	3.1729	945.04	191.255	19.2459	1861.17	0.195215	51.7469	8.71274	6.04542	6.06888	19.5101	25.8285	822.016	0.215673	20.0264	1998.57	0.251907	14.7057	85755.5	23.3033	3.12361	25.5399	535.683	5.86795	906.356	8.46646	23.2304	11.778	272.359	141750	182.58	2553.99	0.248935	67.6275
TARGET-10-PARXMC	2818	7.72055	0	27.4745	0.0921816	0.101947	1426.16	0.106251	8.82732	25614.2	0.0911887	7.00731	3.60297	14.0505	68.904	1.85753	2134.78	234.147	8.70316	670.621	0.0872815	22.7338	13.814	0.105973	1.88443	5.33128	0.11077	712.335	3.55998	3.62674	2699.45	0.104767	7.10304	10863.5	100.82	0.0946646	17.3985	1049.31	1.8775	659.842	1.8756	38.2824	24.4564	1408.61	163544	670.092	7556.14	3.61491	32.9663
TARGET-10-PARGFV	3311	9.07123	0	8.61392	0	0.836362	1980.74	0	41.3976	26888.9	0	4.29305	2.56237	119.095	29.3531	3.42922	1253.16	101.837	17.3102	3094.93	0	58.6767	5.15634	0	7.74485	20.7616	115.856	4772.76	0	13.7951	8198.32	6.0194	63.8706	67738	18.0951	0.836488	10.3358	4024.46	1.69898	243.367	5.16657	39.6898	1.70403	642.104	204845	202.881	6624.02	6.88683	25.8864
TARGET-10-PAPBZK	790	2.16438	1	7.31825	3.31203	0	674.4	0	97.7314	29951.1	1.27704	27.0814	0	32.0782	7.29983	3.29337	473.462	22.0312	1.27243	87074.7	6.08889	27.3955	3.2842	0	11.352	0	0	1582.61	3.30648	9.99425	4248.38	0	16.0051	4630.1	5.96423	0	1.27436	5726.53	3.29361	129.87	2.61978	19.3597	2.62516	677.775	77186.5	9.30805	7249.62	3.95585	3.27979
TARGET-10-PASSXJ	552	1.51233	1	13.1441	2.206	0.0136811	1326.37	2.21015	4.39824	27202.9	0.0126105	9.85445	3.30319	5.49444	20.8159	1.11064	1139.08	81.0586	6.58088	2657.11	0.0122048	81.047	10.9515	0.014065	6.58885	8.76942	20.8188	1559.66	3.29802	22.9937	2904.63	5.49255	38.3459	44330.5	16.4491	3.29866	10.9663	1746.95	2.20866	185.115	6.57353	30.6804	15.3507	1012.02	89886.5	37.2574	9045.73	7.67716	30.6652
TARGET-10-PARJZZ	993	2.72055	1	8.56105	0.13357	0.149836	2426.08	0.157165	10.7481	12961	0.131943	10.4748	2.31818	10.7558	27.3455	8.62147	1249.05	84.3453	6.43307	918.454	0.125589	52.7762	10.538	0.156688	0.158914	8.51927	43.9763	1346.02	0.136406	8.61692	1653.5	0.154626	8.65916	28878.6	19.1917	4.31136	6.53234	1356.54	0.144133	78.1647	2.30499	27.5511	10.7234	341.41	145326	237.322	6703.84	8.52045	19.0874
TARGET-10-PAPDUV	3501	9.59178	0	13.4417	1.40717	14.7119	1200.28	0.0503847	4.09387	42856.5	1.40631	8.07841	1.41218	37.7063	6.79114	4.09053	51.1372	22.9232	13.3819	40340.4	0.0427186	21.5768	2.7564	0.0502757	13.4616	14.744	12.1583	17636.3	14.5618	20.1565	3603.44	0.0498028	1.40569	41681.7	18.8906	8.01914	4.10377	13722.8	6.73246	207.038	1.41081	8.13786	0.0539793	434.193	316452	108.859	20632.5	0.0494678	44.28
TARGET-10-PAPIGX	644	1.76438	0	2.38024	0.164524	0.1748	1051.09	0.0835859	2031.06	31489.7	2.36362	6.0601	0.155555	99.9458	18.9194	11.0289	817.343	6.72994	0.140701	175459	22.8532	68.5869	0.157313	0.152572	8.90982	0.151702	4.56238	11139.6	4.45682	35.861	4049.21	0.15617	13.2513	14170.2	11.0865	2.36845	6.62331	11226.6	6.40104	160.606	2.38468	69.3861	2.37502	416.412	132355	8.90501	8774.92	6.64926	11.0841
TARGET-10-PAPCVZ	3248	8.89863	0	7.26562	1.18639	0.327844	2108.04	195.836	72.5333	11814.8	1.18752	6.87156	0	312.946	17.2337	3.36371	2000.78	53.5211	5.10738	20347.6	8.91969	81.3065	5.5346	0.330028	7.68835	4.65513	55.5879	6502.68	5.17456	13.7794	4519.14	4.65077	30.1756	16538.9	12.4217	4.72013	11.5984	8529.71	1.18161	151.668	3.81116	33.2257	8.98255	528.75	88194.8	22.7958	13250.5	16.5379	7.66471
TARGET-10-PAPPGN	2256	6.18082	0	4.78865	0.151606	4.74818	1160.52	0.18001	36.6789	13030.2	6.67621	9.107	6.92822	236.252	7.08415	2.48557	1613.19	32.1187	4.74355	25591.3	2.42892	29.8214	6.97293	0.17943	15.9376	11.3766	0.189526	4400.3	2.47706	13.7822	4243.29	13.605	331.526	15673.9	2.49899	0.15649	40.3655	15955.9	2.50438	143.586	0.162205	65.8372	7.04204	559.891	58069.5	25.2976	21224.8	11.3786	7.0898
TARGET-10-PASKHT	716	1.96164	1	2.87333	0.181055	0.206452	502.638	0.218193	61.8292	13390.9	0.178563	19.7662	0.204337	66.9028	10.5334	0.244573	1240.6	5.42656	2.85344	44179.6	9.50215	107.385	0.209887	0.217423	5.42423	5.37711	0.230907	1709.7	5.18086	2.87855	3439.44	29.8103	15.7037	5131.03	2.83946	2.79971	7.96941	7217.1	10.0639	125.895	2.82446	18.2457	0.244952	692.134	41789	0.241289	2048	2.86618	0.231313
TARGET-10-PAPEFH	852	2.33425	1	32.345	0.202598	0.232739	982.599	196.844	3.09239	4639.2	0.199666	0.230793	10.9981	17.0743	73.5875	0.278915	370.492	307.465	21.3227	414.936	0.188352	75.1521	5.82211	0.245911	0.250253	52.6257	25.1213	504.046	0.207744	3.14316	701.634	0.241917	5.93109	29018.4	17.0747	0.210033	32.8888	267.455	0.221996	975.489	3.06949	25.3414	3.07391	97.77	83657.7	188.567	1191.38	3.1244	33.2983
TARGET-10-PAPSPN	733	2.00822	1	10.5703	4.22974	0.00814719	2102.62	0.0083852	3.17975	73424.8	0.00752423	4.23565	12.6701	10.5775	7.40769	7.40615	1589.12	103.548	7.40013	2933.12	0.00728748	60.2304	16.8921	0.00836999	4.23793	7.40268	45.4192	3130.7	2.12304	20.0746	6300.47	2.1248	20.0867	33022.8	24.3139	1.06753	13.7415	4547.59	3.17937	489.197	5.28758	39.0989	6.34914	894.938	131637	175.377	11711.3	8.4577	19.0255
TARGET-10-PANPJI	4081	11.1808	0	20.2065	1.70095	2.62576	2605.78	0	1674.04	80853.9	1.72981	10.988	0	123.52	25.5443	11.2672	2874.77	33.41	1.09294	214493	16.9736	69.0656	4.50111	0	14.9522	2.95202	2.00762	30145.9	7.74129	35.6651	5858.59	0	10.9238	22501.6	28.4987	3.59702	2.01009	21571.4	15.0555	192.137	5.14842	83.395	0	978.092	366077	22.7075	23052.2	26.2803	10.6186
TARGET-10-PARSZH	2400	6.57534	0	21.9035	0.00584305	0.00627366	1103.03	2.09606	150.275	59531.1	3.13552	15.6406	1.05213	53.2293	32.345	3.13793	216.023	164.872	10.4334	7567.8	1.05144	60.5291	7.30942	0.00644371	1.05195	6.26752	26.0899	2226.93	2.09471	10.4421	3339.35	1.05208	15.6624	13151.8	0.00679961	1.05196	9.39911	4012.44	23.9592	110.625	2.09533	7.31411	9.39945	369.424	87555.6	60.5317	15406.9	2.09599	13.5736
TARGET-10-PARBVI	1172	3.21096	1	21.1356	4.00083	1.39018	662.85	0.0477133	143.195	26112.4	2.69504	2.71377	9.27553	284.851	11.9851	10.6638	1284.52	53.0794	5.34666	23509	3.98024	55.7064	2.7159	0.0476112	10.6428	6.6714	62.1303	5718.51	4.00745	9.33323	5726.45	0.0471679	53.0367	31274.1	262.337	9.21006	29.0962	7592.92	11.8561	184.31	2.70803	83.4253	0.05108	1556.15	79229.3	66.3185	12925.6	18.4754	25.2021
TARGET-10-PARMXF	951	2.60548	1	7.03583	3.91055	0	1493.12	0	3.88879	14111.3	1.53177	34.8385	0	87.1558	4.66711	7.03125	307.848	28.2303	3.88979	21992.5	7.93279	13.3063	1.52705	0	15.7066	1.52703	0	738.273	2.3201	11.753	8768	0	232.006	1535.51	14.0929	20.6586	0	3913.83	22.178	219.893	3.89753	17.2368	0	268.577	25534.8	4.67104	2455.26	3.88628	1.52926
TARGET-10-PARGVZ	3152	8.63562	0	13.1405	5.25771	0	1989.67	0	16.6207	38285.6	0	12.2825	0	70.0689	21.897	15.7468	900.63	128.797	17.5682	2100.04	0	174.418	4.35859	0	1.72698	21.0718	11.3665	4752.07	1.72926	17.5179	6446.51	1.72684	1.72942	15626.5	14.8679	6.1348	11.3724	2587.16	1.72772	351.32	3.48554	14.8684	45.5335	417.01	137490	72.7053	5186.61	14.0294	21.892
TARGET-10-PAPJXI	3229	8.84658	0	14.9901	0.446023	1.50821	1950.42	0	11.1352	13407.4	0	0	8.00257	75.3126	20.2839	15.4171	705.114	103.708	10.1763	10035.9	0	108.614	11.7822	0.449138	4.1812	10.685	0.982111	10121.7	3.69164	18.167	6152.29	3.11274	0	20432.8	14.3374	0.97667	13.3159	8219.13	2.58661	203.094	13.5466	11.6628	1.52892	865.041	474542	129.973	14548.5	5.80895	10.0665
TARGET-10-PAPKNC	1413	3.87123	1	7.2689	1.04476	2.08279	1551.23	0.00557657	35.2869	95208.9	8.291	3.11988	5.19315	53.9629	3.12067	8.30757	398.45	69.5248	3.11992	41418.2	1.04443	24.9103	5.19406	0.00556659	22.8212	5.19432	1.04459	7981.28	6.22429	14.5299	5542.9	12.4511	122.42	8848.73	71.6011	21.7452	9.34472	12180.5	34.1789	108.957	4.15527	53.9549	1.04362	2580.51	123291	71.599	9205.67	10.3772	18.6816
TARGET-10-PAPZST	859	2.35342	0	11.3077	0.108088	2.04766	1461.35	0.125575	18.9413	36790.8	0.106865	25.582	3.89909	0.136283	3.93403	9.53672	22.661	136.862	9.37863	2155.51	0.102066	11.4423	2.04948	0.125225	7.64914	5.76247	5.81124	1345.16	2.02695	2.05068	5241.08	0.123716	9.56621	25291.9	17.0689	7.42632	0.128505	1382.67	0.115975	386.422	18.1788	35.7359	0.137354	410.975	83270.3	71.3756	4663.5	0.122651	46.6778
TARGET-10-PATCTI	482	1.32055	1	3.62661	0.828589	0.368044	1839.7	0	0.846045	29856.9	12.9771	44.4111	16.0494	85.3751	5.49002	5.04442	172.187	45.191	13.1636	29914.9	1.30502	41.0059	11.2185	3.62606	14.4544	2.69213	1.29793	2254.24	8.51115	9.24881	3699.44	32.1354	35.4119	9811.05	7.36552	6.0782	5.49399	9946.49	40.8286	97.4746	1.76202	26.9973	66.6602	902.554	56004.6	37.7171	3424.36	0.828391	5.95631
TARGET-10-PANSPW	870	2.38356	1	16.8642	0.00728308	1.06506	1699.6	0.00805188	1.06332	95620.1	0.00722626	9.48823	3.1731	2.11819	17.9293	4.2266	1508.76	123.356	4.22638	668.461	0.0069992	55.8854	18.9607	1.06493	4.22846	10.5447	3.1743	799.201	0.0073809	7.39061	4364.97	1.06499	3.17365	25198.7	22.1529	6.32462	46.3574	979.492	0.00763968	535.596	5.27615	18.9887	11.6073	1110.22	85115.8	44.2921	6269.11	10.5447	5.28324
TARGET-10-PAPLDL	1187	3.25205	1	15.906	4.9028	7.36595	1327.59	0.0330638	8.61617	11044.3	0.0293293	0.0318742	0.0318296	17.1936	33.0389	14.7384	213.144	148.159	1.26921	2330.63	0.0283176	105.29	2.49453	0.0329971	9.8272	17.0995	30.6101	3527.14	0.0300221	11.0545	4399.1	1.26915	33.1006	35332.3	109.015	2.48663	9.83339	835.282	0.0311882	252.314	1.26853	9.84569	4.9363	421.336	208072	162.827	5708.32	3.71714	18.3989
TARGET-10-PAPSPG	1533	4.2	1	13.9042	1.41271	0.679919	1746.42	0	33.5973	40617.1	0.680153	13.2175	7.29915	49.6981	15.3286	7.26904	279.429	81.1849	9.5142	3070.64	0	33.6068	16.8918	0.680923	8.00445	13.9259	21.1936	1825.39	2.148	18.2851	4002.05	10.2272	19.7001	7428.29	5.80147	5.10978	9.46711	4566.11	2.14293	590.494	2.88032	14.5769	8.002	834.052	94901.1	59.9565	7254.18	13.1867	9.4575
TARGET-10-PAKSWW	1592	4.36164	1	0.998079	2.99497	0	1181.1	0	0	23352.4	5.99048	162.752	0	26.9562	1.99646	8.98523	18.9692	58.9048	17.9717	16024.2	0	3.99325	1.99645	0	30.9507	5.99011	0	1713.24	2.99495	11.9805	10772.6	2.99485	174.72	6781.07	5.99004	20.968	0	3447.44	28.9554	151.755	2.9949	18.9691	0.998134	233.623	46464.1	11.9804	1698.26	0	6.9884
TARGET-10-PAPCUR	369	1.01096	1	4.92299	3.68146	0.0314179	706.649	0.0324368	7.36417	15699.1	1.26105	91.7368	2.48376	15.9118	7.36722	2.47729	683.463	34.2165	15.803	2942.41	0.0277908	30.5516	1.26409	3.70563	8.57648	3.7034	0.0334849	3236.51	1.26223	11.0154	4106.63	1.26399	4.92662	9216.43	11.0288	6.09946	7.36376	1202.13	1.26363	392.964	2.48058	7.36931	2.47667	403.992	52634.3	19.5738	1713.48	1.26406	31.7226
TARGET-10-PANUSN	1715	4.69863	1	3.92177	1.34147	11.571	1777.69	0.042297	0.0450485	26526.1	0.0373603	93.9637	0.0406607	60.5972	9.07292	2.62419	618.384	43.8534	23.005	3192.16	0.0360303	10.3669	1.34543	0.0422084	9.05908	1.34542	0.0437211	1147.83	0.0382728	14.1975	9134.36	0.0418235	39.9673	2445.02	29.6902	37.9127	7.78198	2871.41	1.34461	350.394	2.62732	19.3782	0.0452145	592.603	43075.4	50.2872	1150.4	6.48097	24.4922
[truncated: 415 more columns]
